# Supplementary material
Source: Research Square preprint supplement (doi:10.21203/rs.3.rs-10112503/v1)
Supplement: Supplementary file 1 [file c37b3b0457136a5497494a7d.doc]

Supplementary Materials for

**A Non-Monotonic Reconfigurable Neural Unit with Dynamic Integration Control for Advanced Neuromorphic Computing**

*Xitong An1, Yan Wang1, Chao Dou1, Haoyue Lu1, Yueying Li1, Xuan Deng1, Dong Sun2, Jing Liu1,**

1 State Key Laboratory of Precision Measuring Technology and Instruments, School of Precision Instruments and Opto-electronics Engineering, Tianjin University, Tianjin City 300072, China

2 Center for Quantum Materials, School of Physics, Peking University, Beijing, China

* Corresponding author email: [jingliu_1112@tju.edu.cn](mailto:jingliu_1112@tju.edu.cn)

**CONTENTS**

Supplementary Note 1. AFM image of the device [3](#__RefHeading___Toc7934)

Supplementary Note 2. Synaptic characteristics of the MoTe2/h-BN transistor [4](#__RefHeading___Toc14784)

Supplementary Note 3. LIF function of Ag/h-BN/Gr memristor [8](#__RefHeading___Toc7460)

Supplementary Note 4. LIF function of RNU [10](#__RefHeading___Toc17385)

Supplementary Note 5. Fashion-MNIST classification [11](#__RefHeading___Toc22774)

Supplementary Note 6. Dynamic EEG classification [12](#__RefHeading___Toc18731)

Supplementary References [13](#__RefHeading___Toc18474)

Supplementary Note 1. AFM image of the device

**
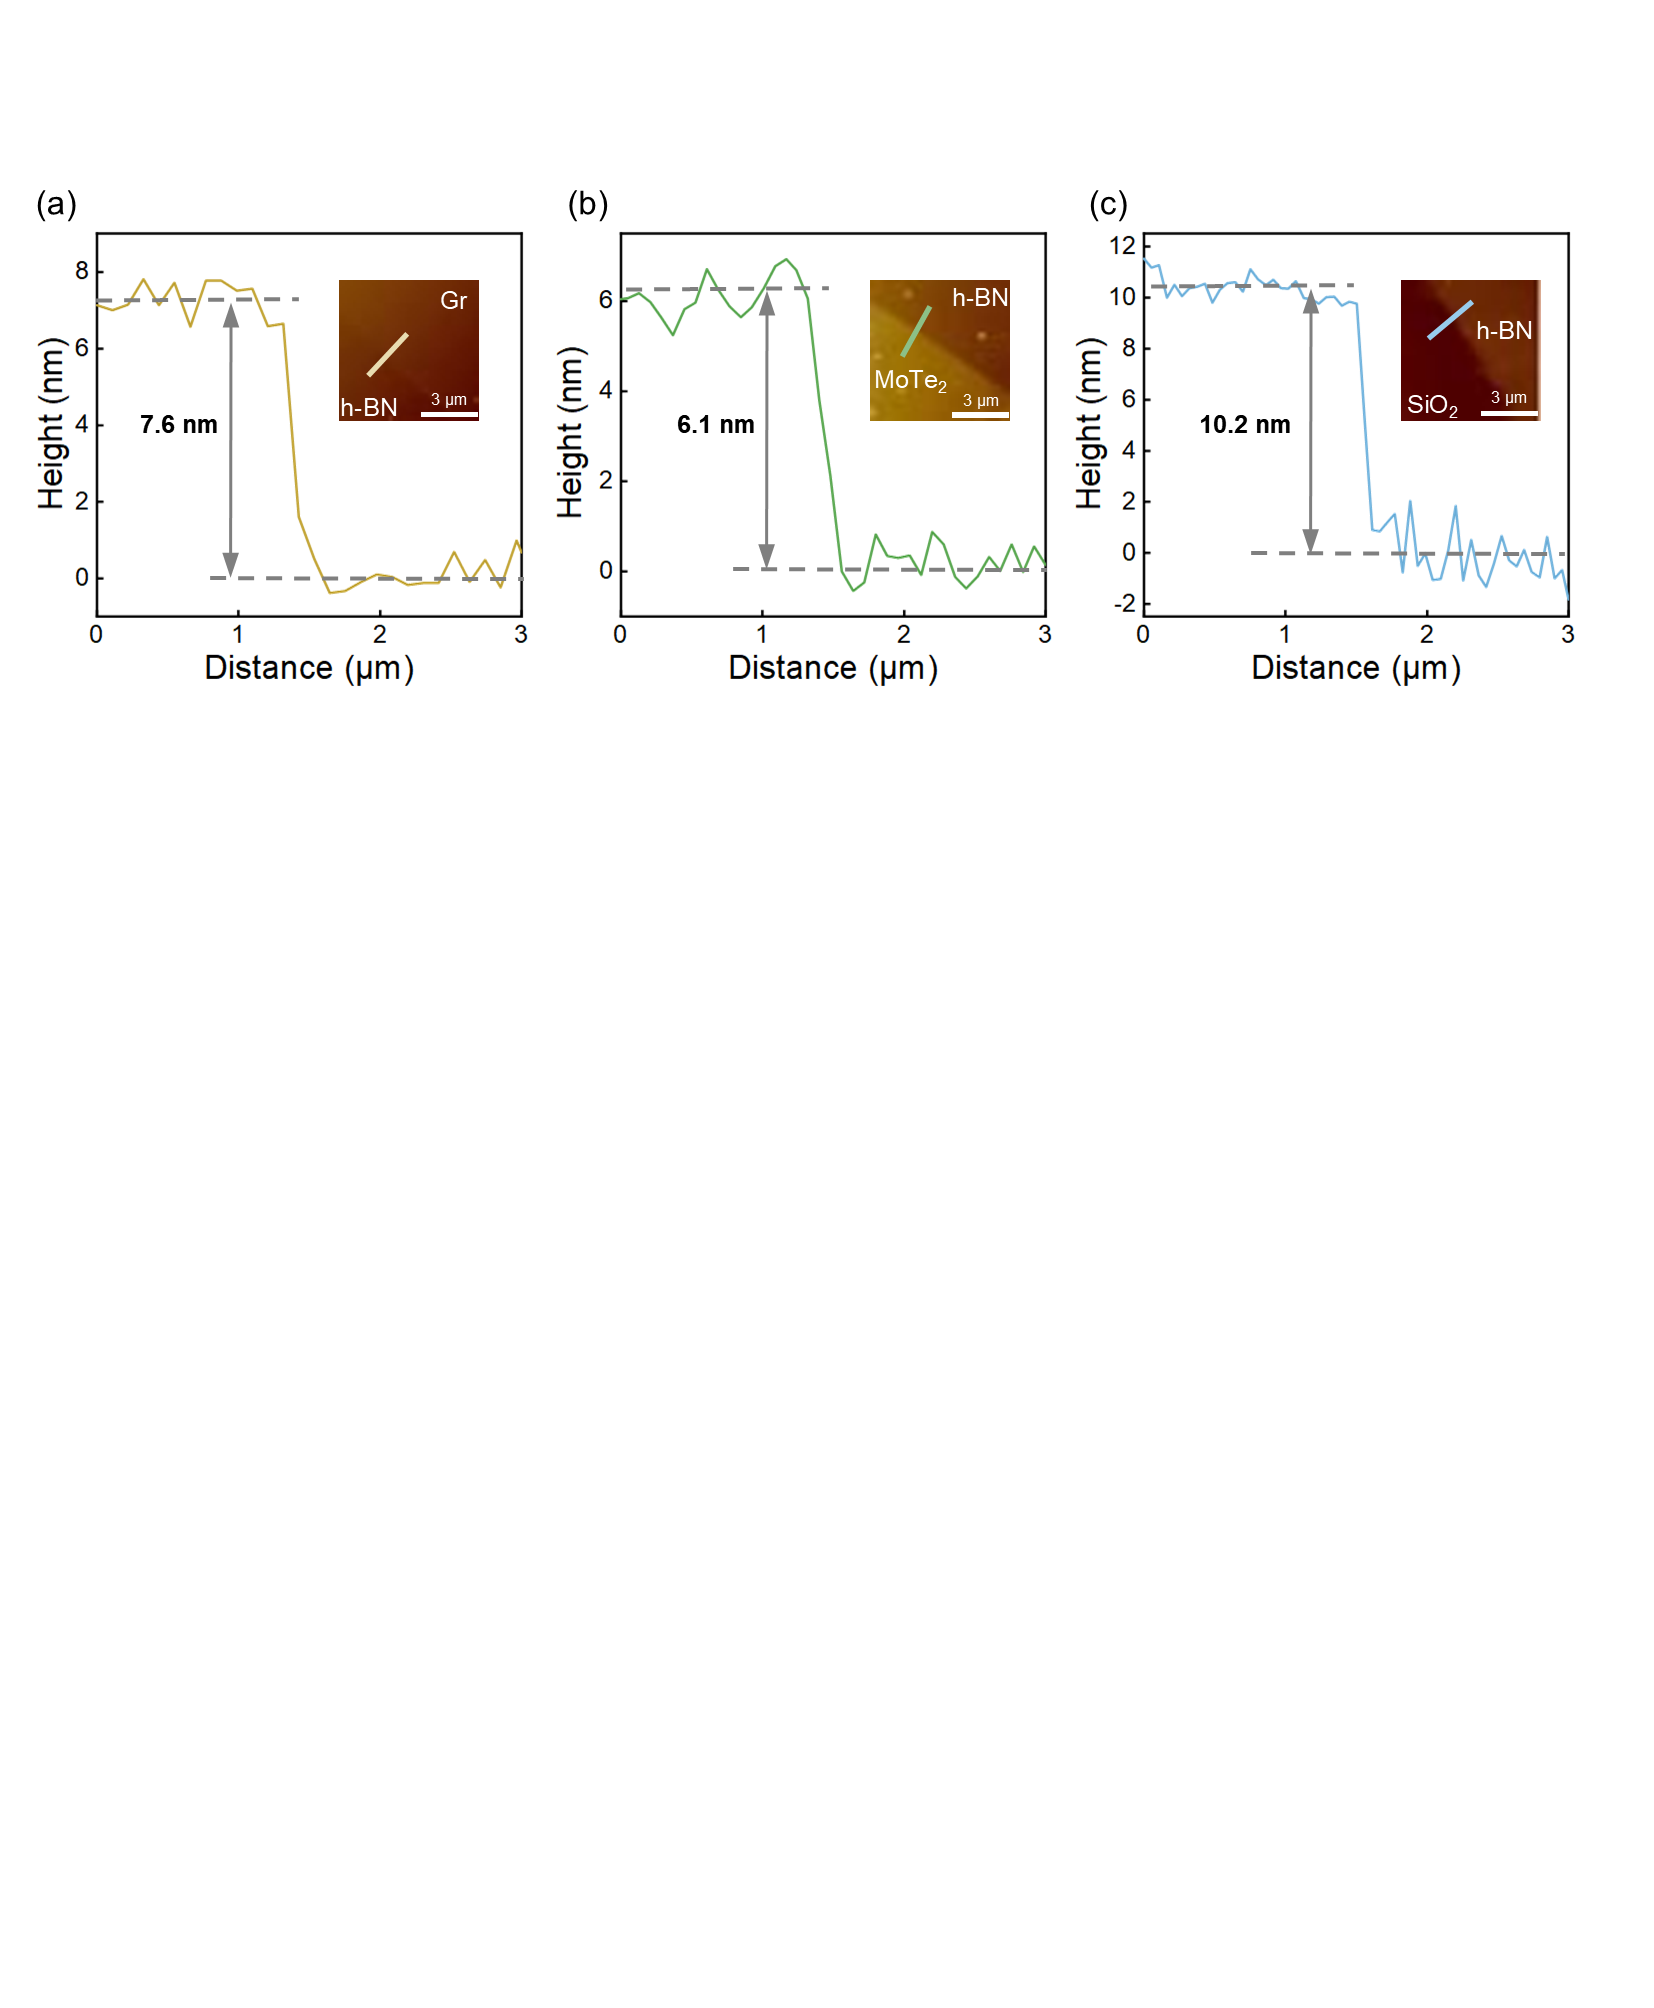
**

**Supplementary Fig. 1 | AFM image of the device.** (a) The thickness of Graphene. (b) The thickness of **MoTe2**. (c) The thickness of h-BN.

Supplementary Note 2. Synaptic characteristics of the MoTe2/h-BN transistor

As shown in the main text, the carrier type and density in the MoTe2 channel can be effectively modulated through combined UV illumination and electrical biasing.(1) Leveraging this tunability, we employed optical and electrical pulses as external stimuli to investigate the synaptic properties of the MoTe2/h-BN heterostructure under both n-doped and p-doped conditions. In biological synapses, presynaptic stimulation triggers signal transmission across the synaptic cleft, leading to changes in postsynaptic current (PSC).(2*,* 3) This behavior is emulated in our device through distinct potentiation and depression protocols tailored to each doping mode. In the n-doped state, 365 nm UV pulses serve as excitatory inputs, while gate-voltage pulses act as inhibitory inputs. Conversely, in the p-doped state, 254 nm UV light combined with gate-voltage pulses functions as the excitatory input, and 254 nm UV pulses alone provide inhibitory stimulation. The synaptic responses of the n-type device are presented in Supplementary Fig. 2, with supplementary characteristics shown in Supplementary Fig. 3, and p-type characteristics detailed in Supplementary Fig. 4.


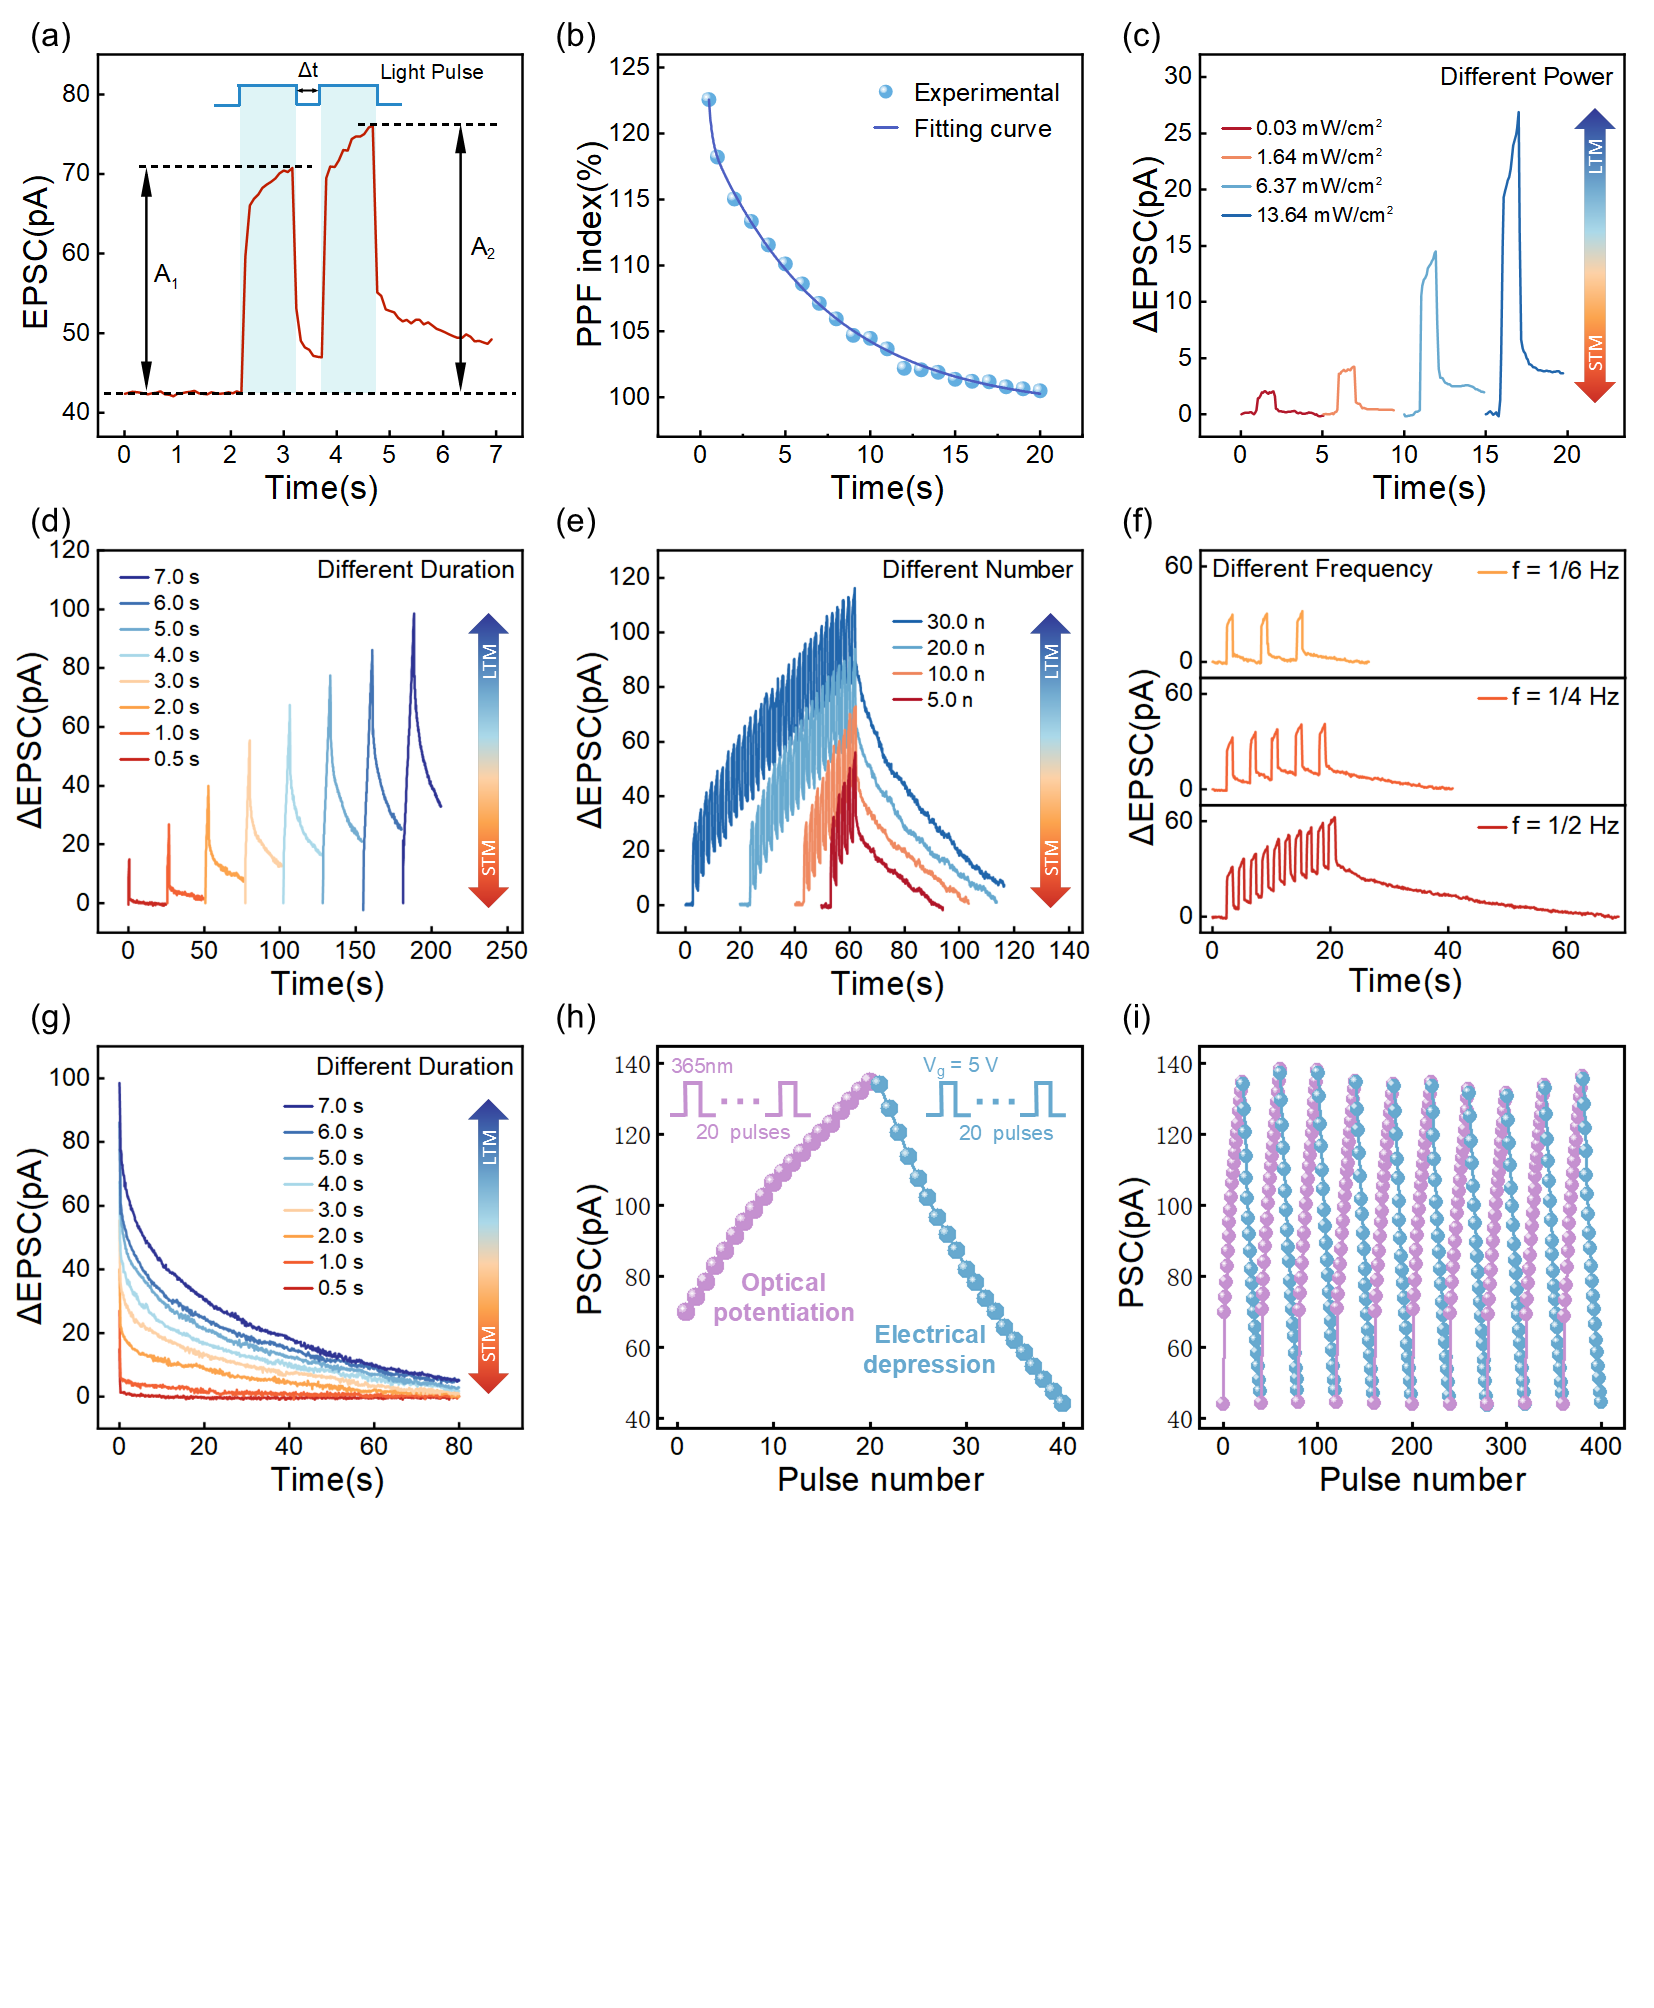


**Supplementary Fig. 2 | Synaptic characteristics of the n-type MoTe2/h-BN transistor.** (a) EPSC induced by two consecutive 365 nm UV pulses with a pulse width of 1 s and an interval Δt of 0.5 s. (b) Dependence of the PPF index on the interval of optical pulses. The optical pulse width is 1 s. (c-f) Transition of device plasticity from STM to LTM through increasing (c) light power (0.03 mW/cm2, 1.64 mW/cm2, 6.37 mW/cm2, 13.64 mW/cm2), (d) pulse duration (0.5 s, 1.0 s, 2.0 s, 3.0 s, 4.0 s, 5.0 s, 6.0 s, 7.0 s), (e) number of pulses (5, 10, 20, 30), (f) pulse frequency (1/6 Hz, 1/4 Hz, 1/2 Hz). (g) Attenuation current after removing the corresponding optical stimulation shown in (d). (h) One representative potentiation-depression cycle induced by optical pulses for potentiation and electrical pulses for depression. The light pulse width is 1 s, while the width and amplitude of the electrical pulse are 1 s and 5 V, respectively. (i) Ten consecutive potentiation-depression cycles under the same stimulation conditions as those used in (h).

Supplementary Fig. 2a shows paired excitatory postsynaptic currents (EPSC) induced by two consecutive optical spikes with a 0.5 s interval. The second response is larger than the first (A2 > A1), demonstrating paired-pulse facilitation (PPF). This facilitation diminishes as the inter-pulse interval (Δt) increases, indicating a transient photo-induced state that decays over time—a behavior analogous to short-term plasticity in biological synapses.(*1*–3) In contrast, two successive negative gate pulses induce paired-pulse depression (PPD), with the depressive effect also weakening as Δt lengthens. After stimulation, the current returns to baseline, consistent with biological synaptic dynamics (Supplementary Fig. 3a–b).(1*,* 3)

The PPF index as a function of pulse interval is summarized in Supplementary Fig. 2b. The facilitation effect decays gradually with longer intervals, reflecting the relaxation of the residual conductive state, consistent with the temporal integration properties of biological synapses.(2*,* 3)

We further probed the transition from short-term memory (STM) to long-term memory (LTM) by systematically varying optical stimulation parameters including power, duration, number, and frequency (Supplementary Fig. 2c-f). Under a fixed pulse width of 1 s, increasing light intensity from 0.03 mW/cm2 to 13.64 mW/cm2 raised ΔEPSC from 2 pA to 27 pA (Supplementary Fig. 2c). With power fixed at 13.64 mW/cm2, extending the pulse width from 0.5 s to 7 s enhanced ΔEPSC from 15 pA to 99 pA (Supplementary Fig. 2d). The subsequent decay of ΔEPSC after stimulus removal (Supplementary Fig. 2g) showed that longer pulses led to higher conductance changes and slower decay, indicating strengthened and prolonged memory retention.(1*,* 4*,* 5) Under repeated optical pulses (width = 1 s, interval = 1 s), ΔEPSC increased from 55 pA to 116 pA as pulse count rose from 5 to 30 (Supplementary Fig. 2e). Increasing pulse frequency from 1/6 Hz to 1/2 Hz also enhanced ΔEPSC responses, reaching 13.5 pA, 18.3 pA, and 49.4 pA, respectively (Supplementary Fig. 2f), effectively mimicking frequency-dependent STM-to-LTM transition in biological systems.(1*,* 4*,* 5)

Pulse-number-dependent potentiation was further quantified in Supplementary Fig. 3c-f. Under 20 consecutive 365 nm pulses (1 s width, 1 s interval), the normalized synaptic weight (An/A1) increased linearly, reaching 1.35 by the 20th pulse (Supplementary Fig. 3d). A shorter-pulse protocol (0.5 s width, 0.5 s interval) also produced linear weight increase but with a reduced slope, reaching 1.10 at the 20th pulse (Supplementary Fig. 3f), confirming that synaptic potentiation can be controllably modulated via optical pulse parameters.(1*,* *4*–6)

Reversible synaptic plasticity was demonstrated using alternated optoelectronic stimulation (Supplementary Fig. 2h). Potentiation was induced via 20 optical pulses (365 nm, 1 s width), increasing PSC from 43 pA to 137 pA. Subsequent depression was achieved with 20 electrical gate pulses (–5 V, 1 s), reducing PSC to 44 pA. Ten repeated cycles of potentiation and depression (Supplementary Fig. 2i) confirm stable and reversible synaptic modulation through optical and electrical inputs. Corresponding results for the p-type device are provided in Supplementary Fig. 4.

**
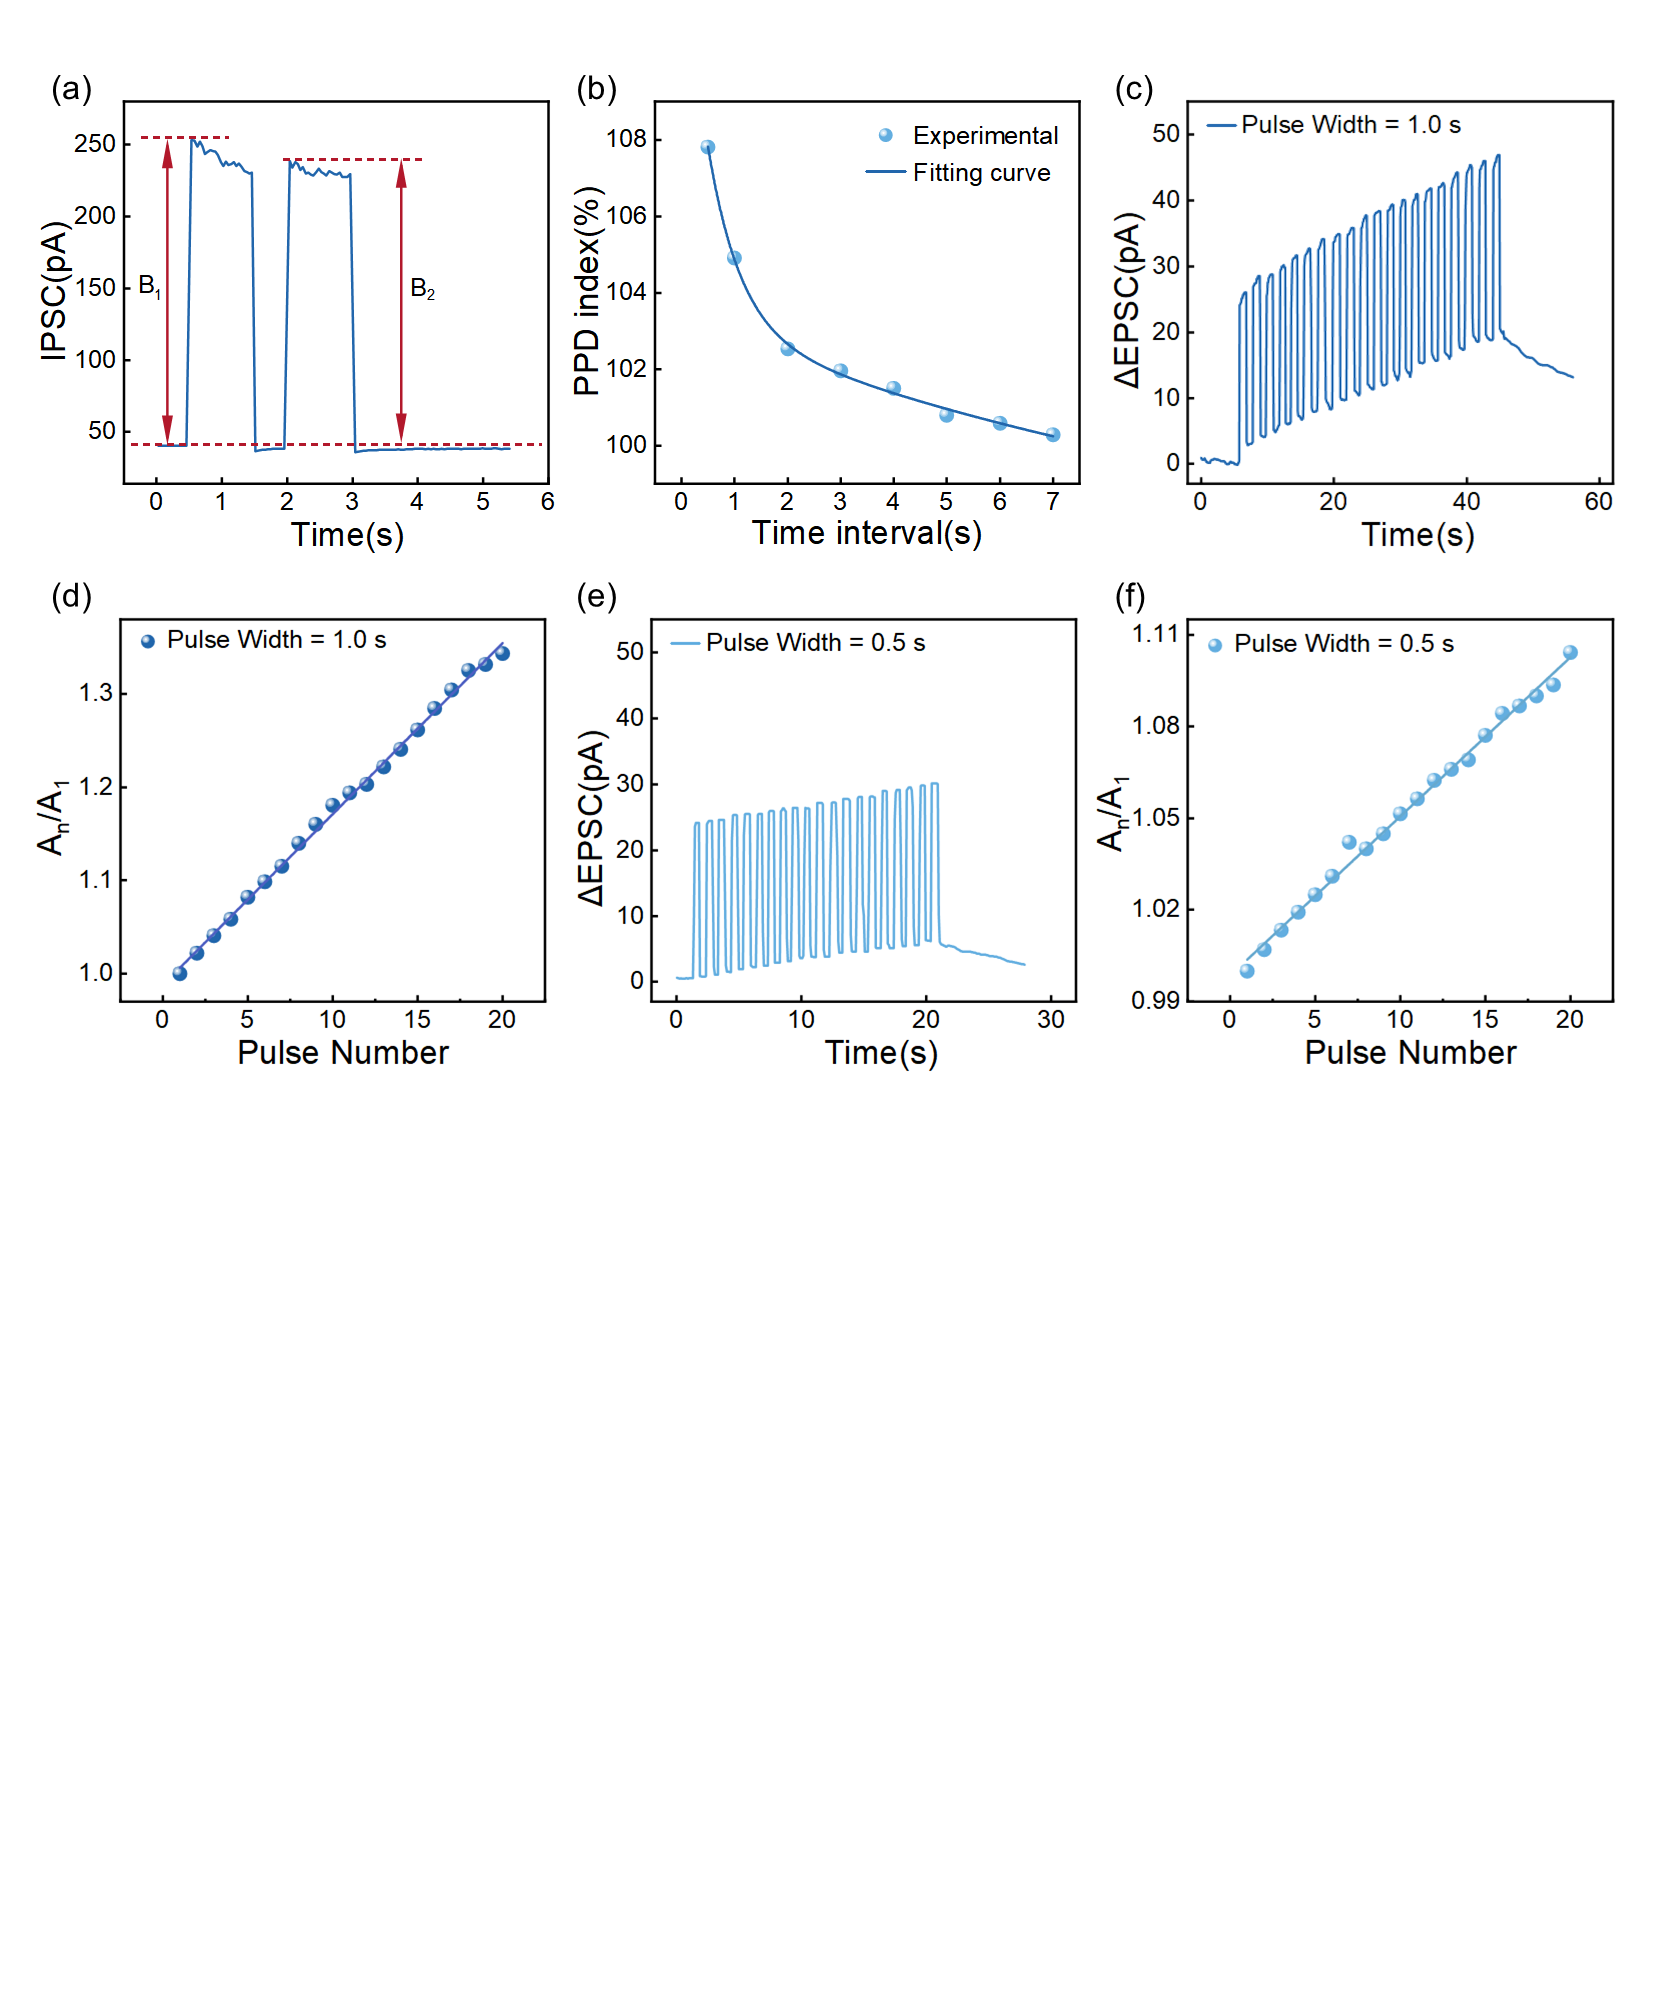
**

**Supplementary Fig. 3 | Supplementary characteristics of the n-type synaptic transistor device.** (a) IPSC induced by two consecutive electrical spikes with an interval Δt of 0.5 s. The electrical pulse width is 1 s. (b) PPD index as a function of the electrical pulse interval. (c) The ΔEPSC response stimulated by 20 consecutive 365 nm light pulses with a pulse width of 1 s and a pulse interval of 1 s. (d) Synaptic weight An/A1 plotted as a function of the number of light pulses under 20 light pulses with a pulse width of 1.0 s and an interval of 1.0 s. (e) ΔEPSC of the device stimulated by a series of light pulses with a pulse width of 0.5 s and an interval of 0.5 s. (f) Synaptic weight An/A1 plotted as a function of the pulse number under the condition shown in (e).

**
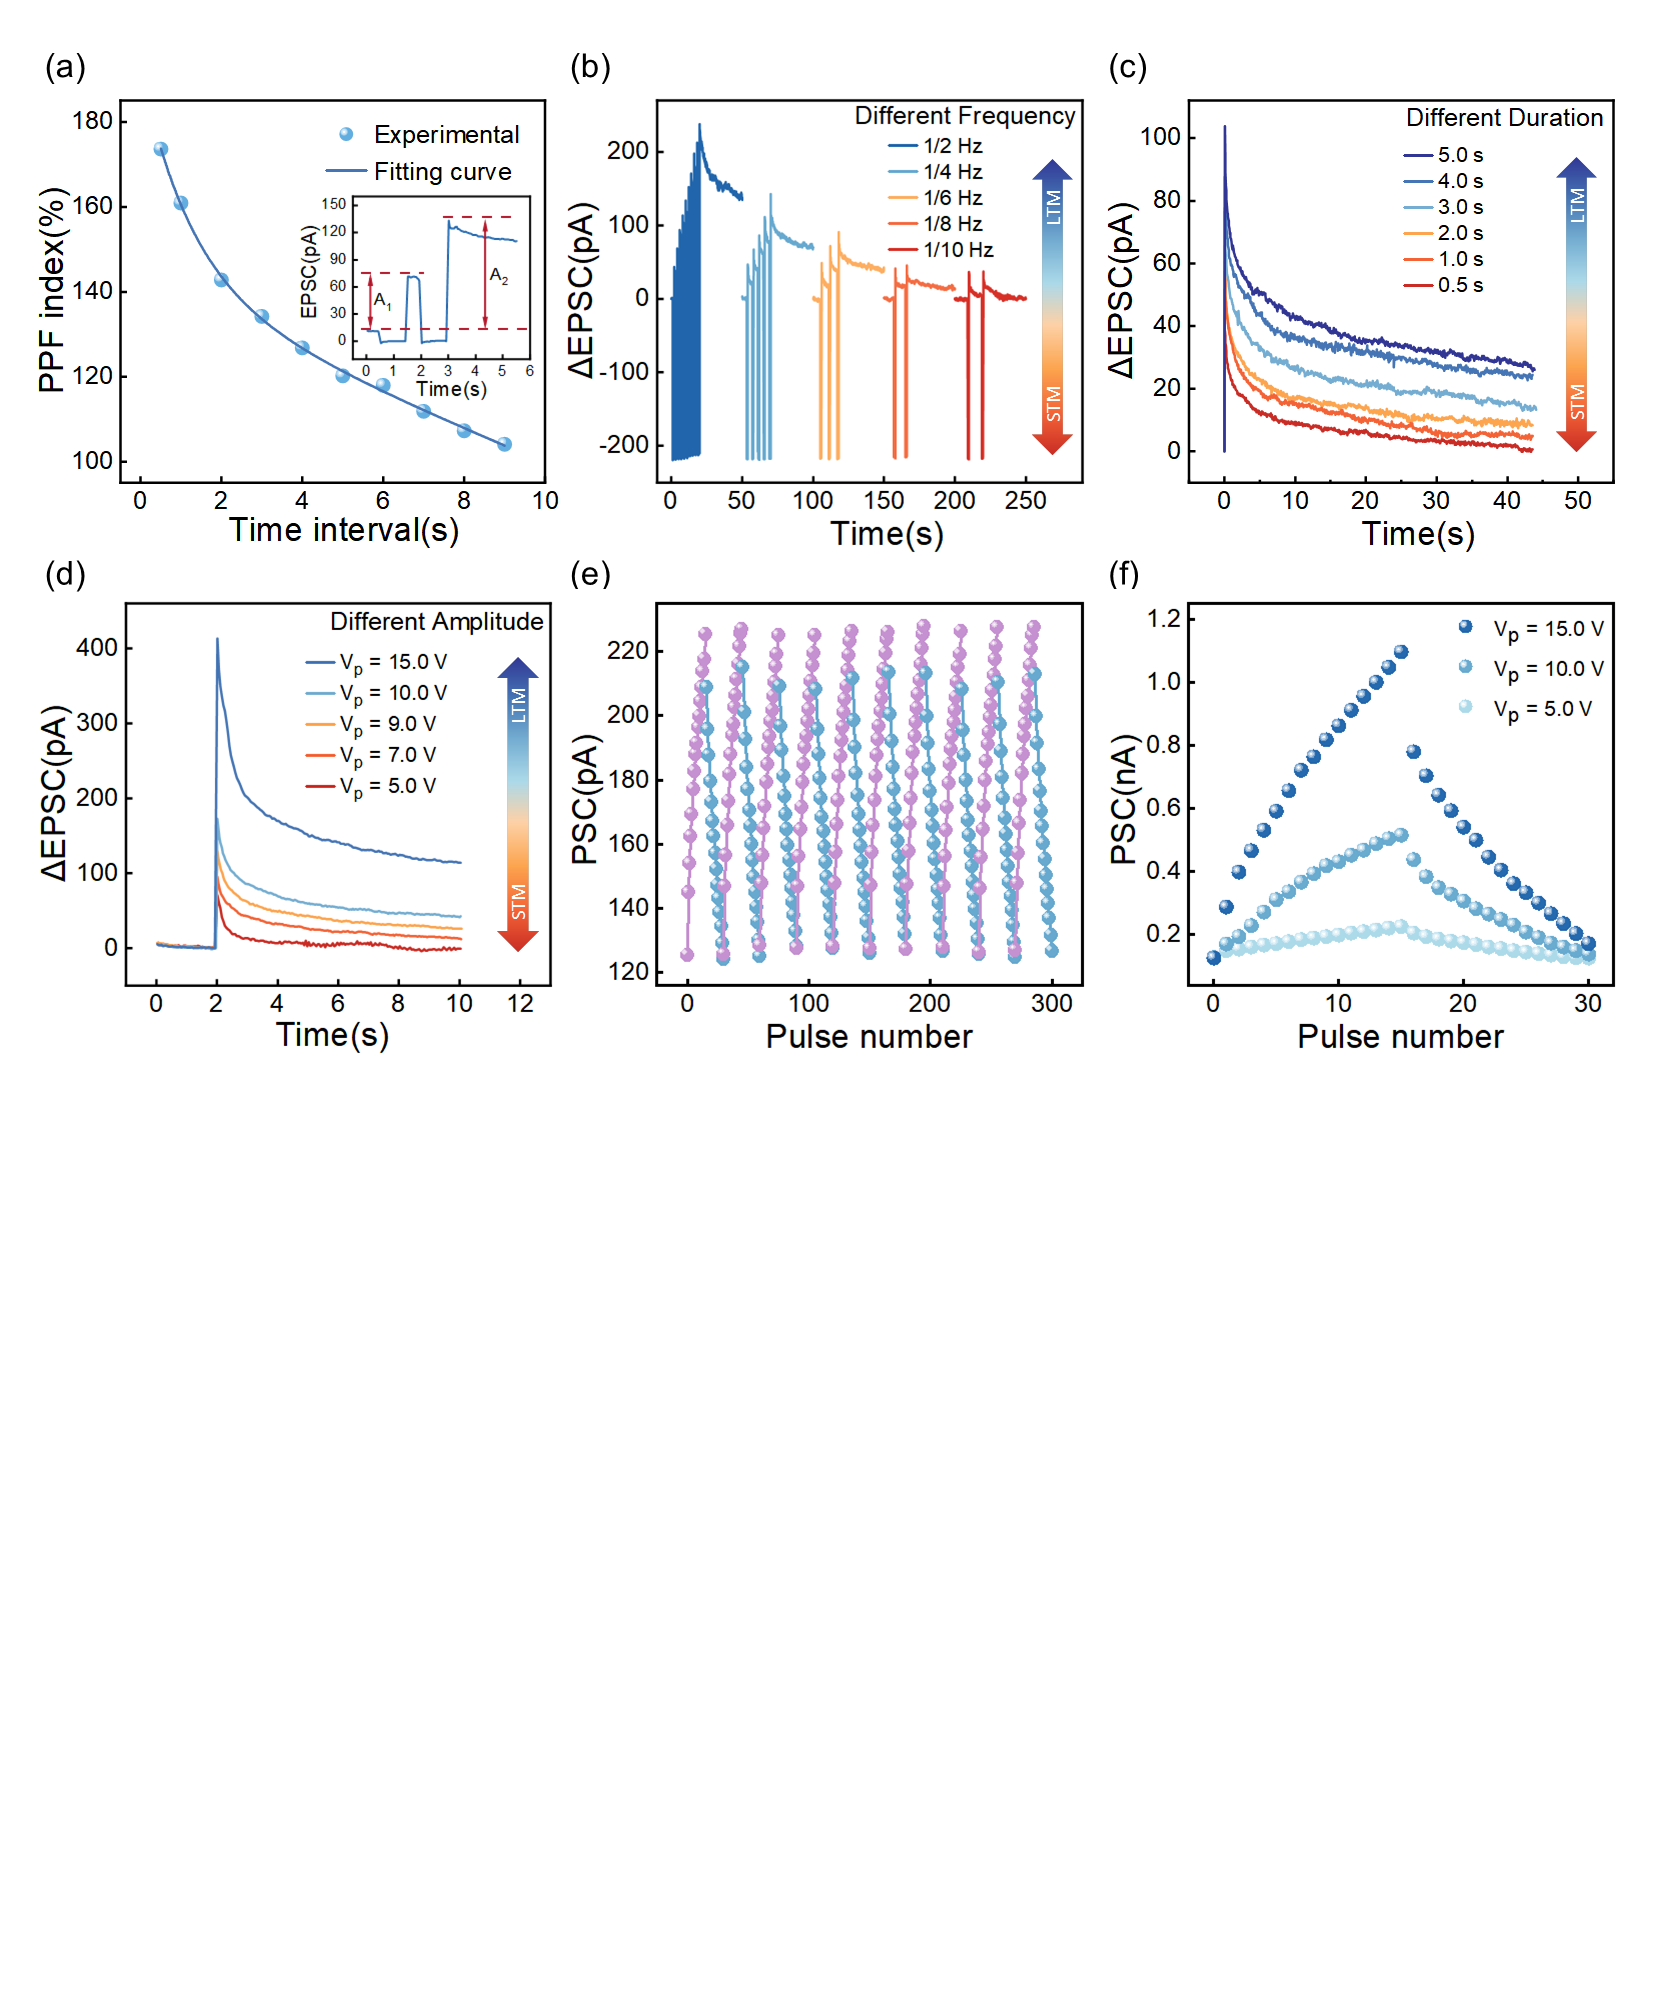
**

**Supplementary Fig. 4 | Synaptic characteristics of the p-type synaptic transistor device.** (a) The PPF index as a function of the pulse interval. The width of both the electrical and light pulse is 1 s. The inset is the dynamic EPSC, when two pulses are applied 0.5 s apart. The first and second peaks are labeled as A1 and A2, respectively. (b-d) Transitioning device plasticity from STM to LTM at different parameters (frequency: 1/10 Hz, 1/8 Hz, 1/6 Hz, 1/4 Hz, 1/2 Hz; duration: 0.5 s, 1.0 s, 2.0 s, 3.0 s, 4.0 s, 5.0 s; amplitude: 5.0 V, 7.0 V, 9.0 V, 10.0 V, 15.0 V). (e) Ten potentiation-depression cycles of the device (light pulses and electrical pulses for potentiation, pulse width: 0.5 s, number = 15, 254 nm; light pulses alone for inhibition, pulse width: 0.5 s, 254 nm). (f) Potentiation-depression cycles under different gate pulse amplitudes. Potentiation is implemented by a series of UV pulses (254 nm, lasting 0.5 s) and Vg pulses with different amplitudes of 5, 10, 15 V, respectively (lasting 0.5 s). Depression is implemented by a series of UV pulses (254 nm, lasting 0.5 s).

In the p-type, the potentiation stage requires the simultaneous application of an electric bias and a light pulse (Vg = 5 V, 254 nm, pulse width: 0.5 s); depression only requires the application of a light pulse (254 nm, duration: 0.5 s).

Supplementary Note 3. LIF function of Ag/h-BN/Gr memristor


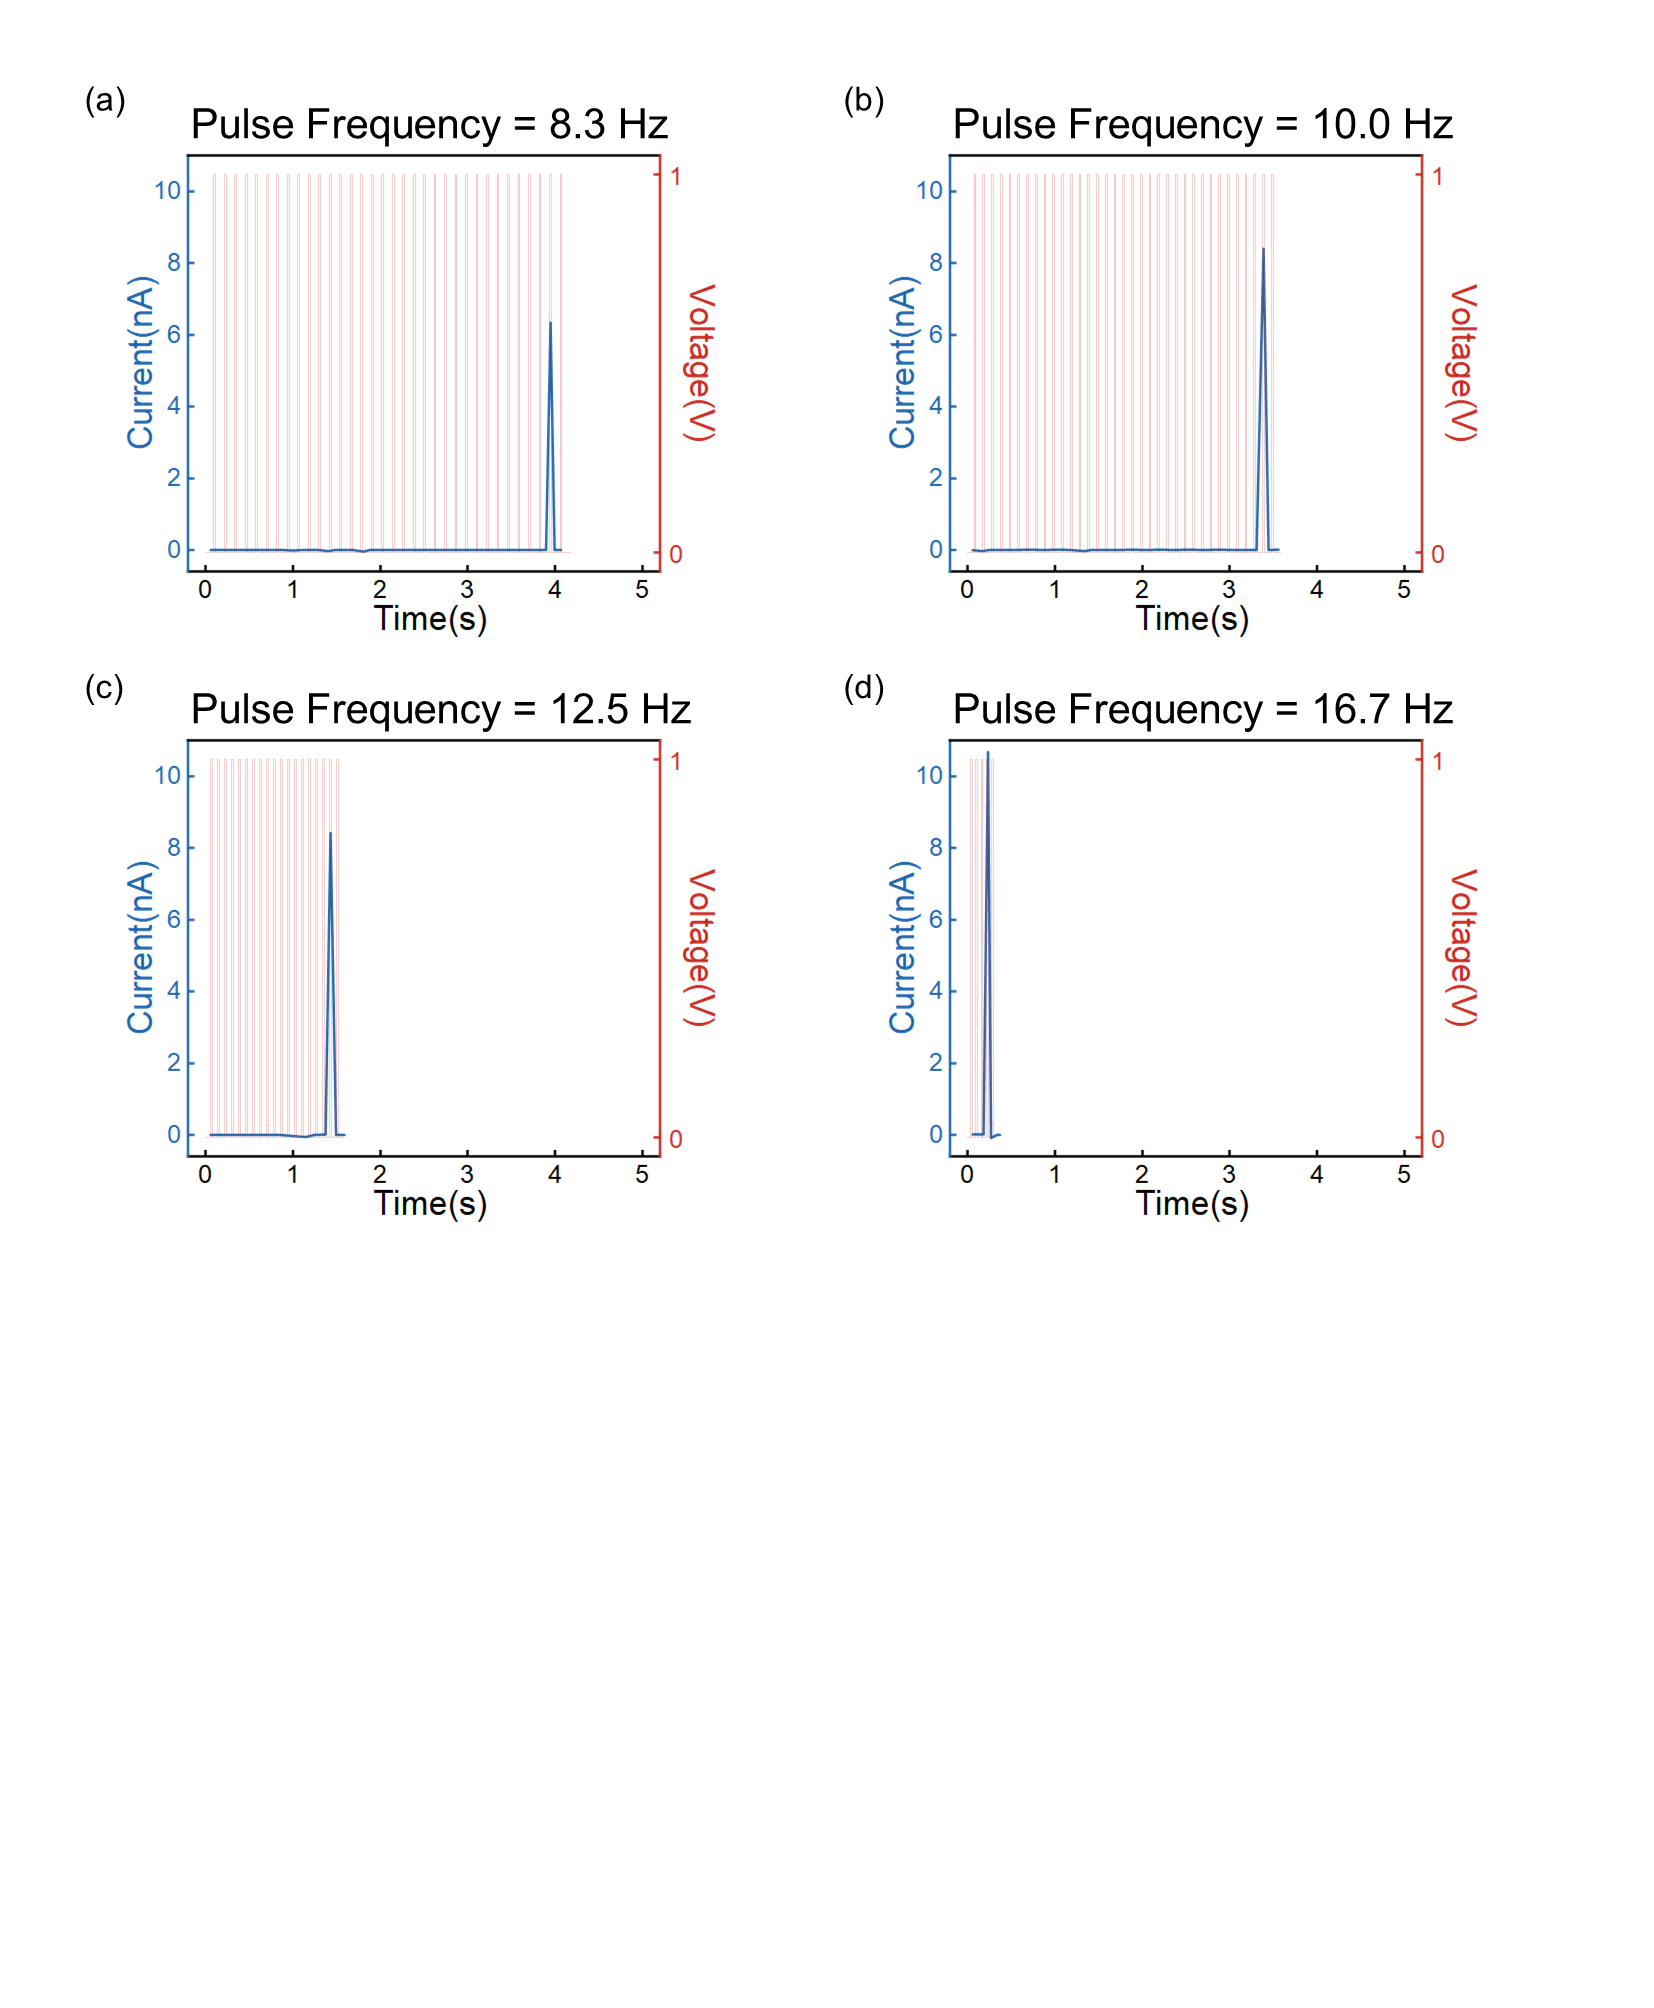


**Supplementary Fig. 5 | The effect of different electrical pulse frequencies on the LIF function of Ag/h-BN/Gr memristor.** (a-d) The pulse intervals were set to 100, 80, 60, and 40 ms, respectively, with a pulse amplitude of 1 V and a pulse width of 20 ms.


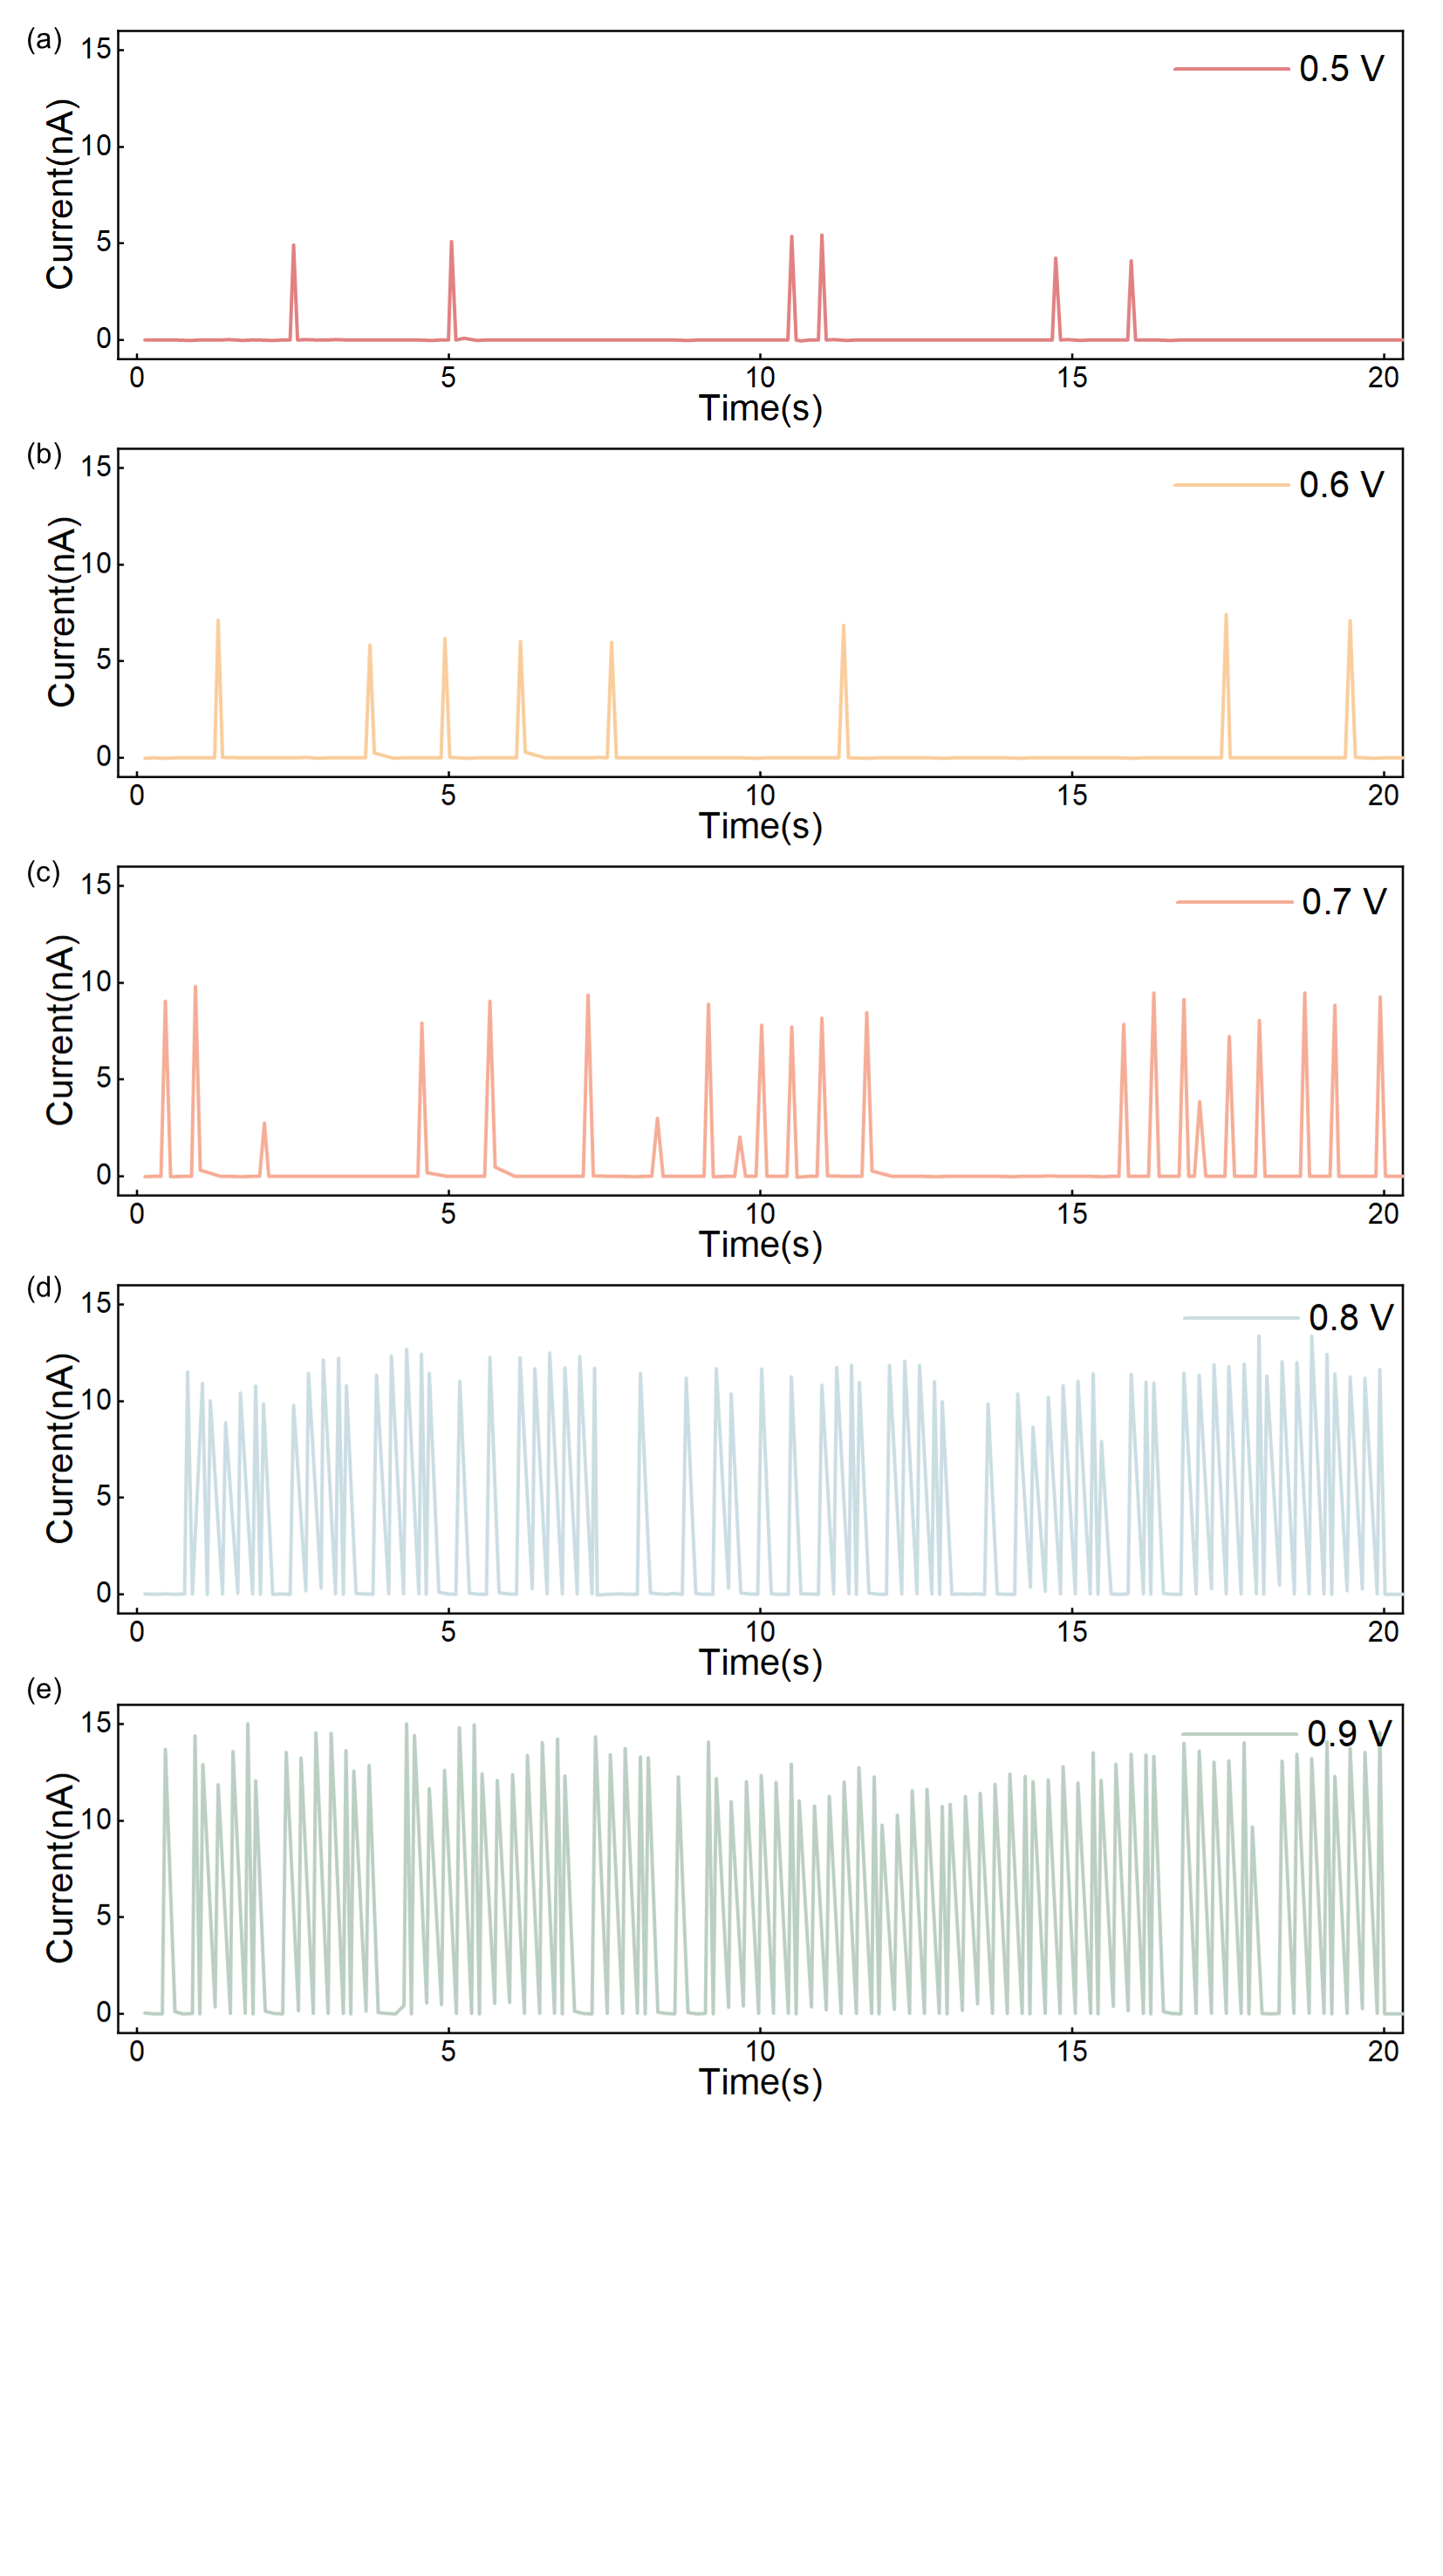


**Supplementary Fig. 6 | The LIF functionality of Ag/h-BN/Gr memristor under different pulse amplitudes.** (a-e) The amplitudes of the electrical pulses are 0.5, 0.6, 0.7, 0.8 and 0.9 V, respectively (interval: 40 ms, width: 20 ms).

Supplementary Note 4. LIF function of RNU


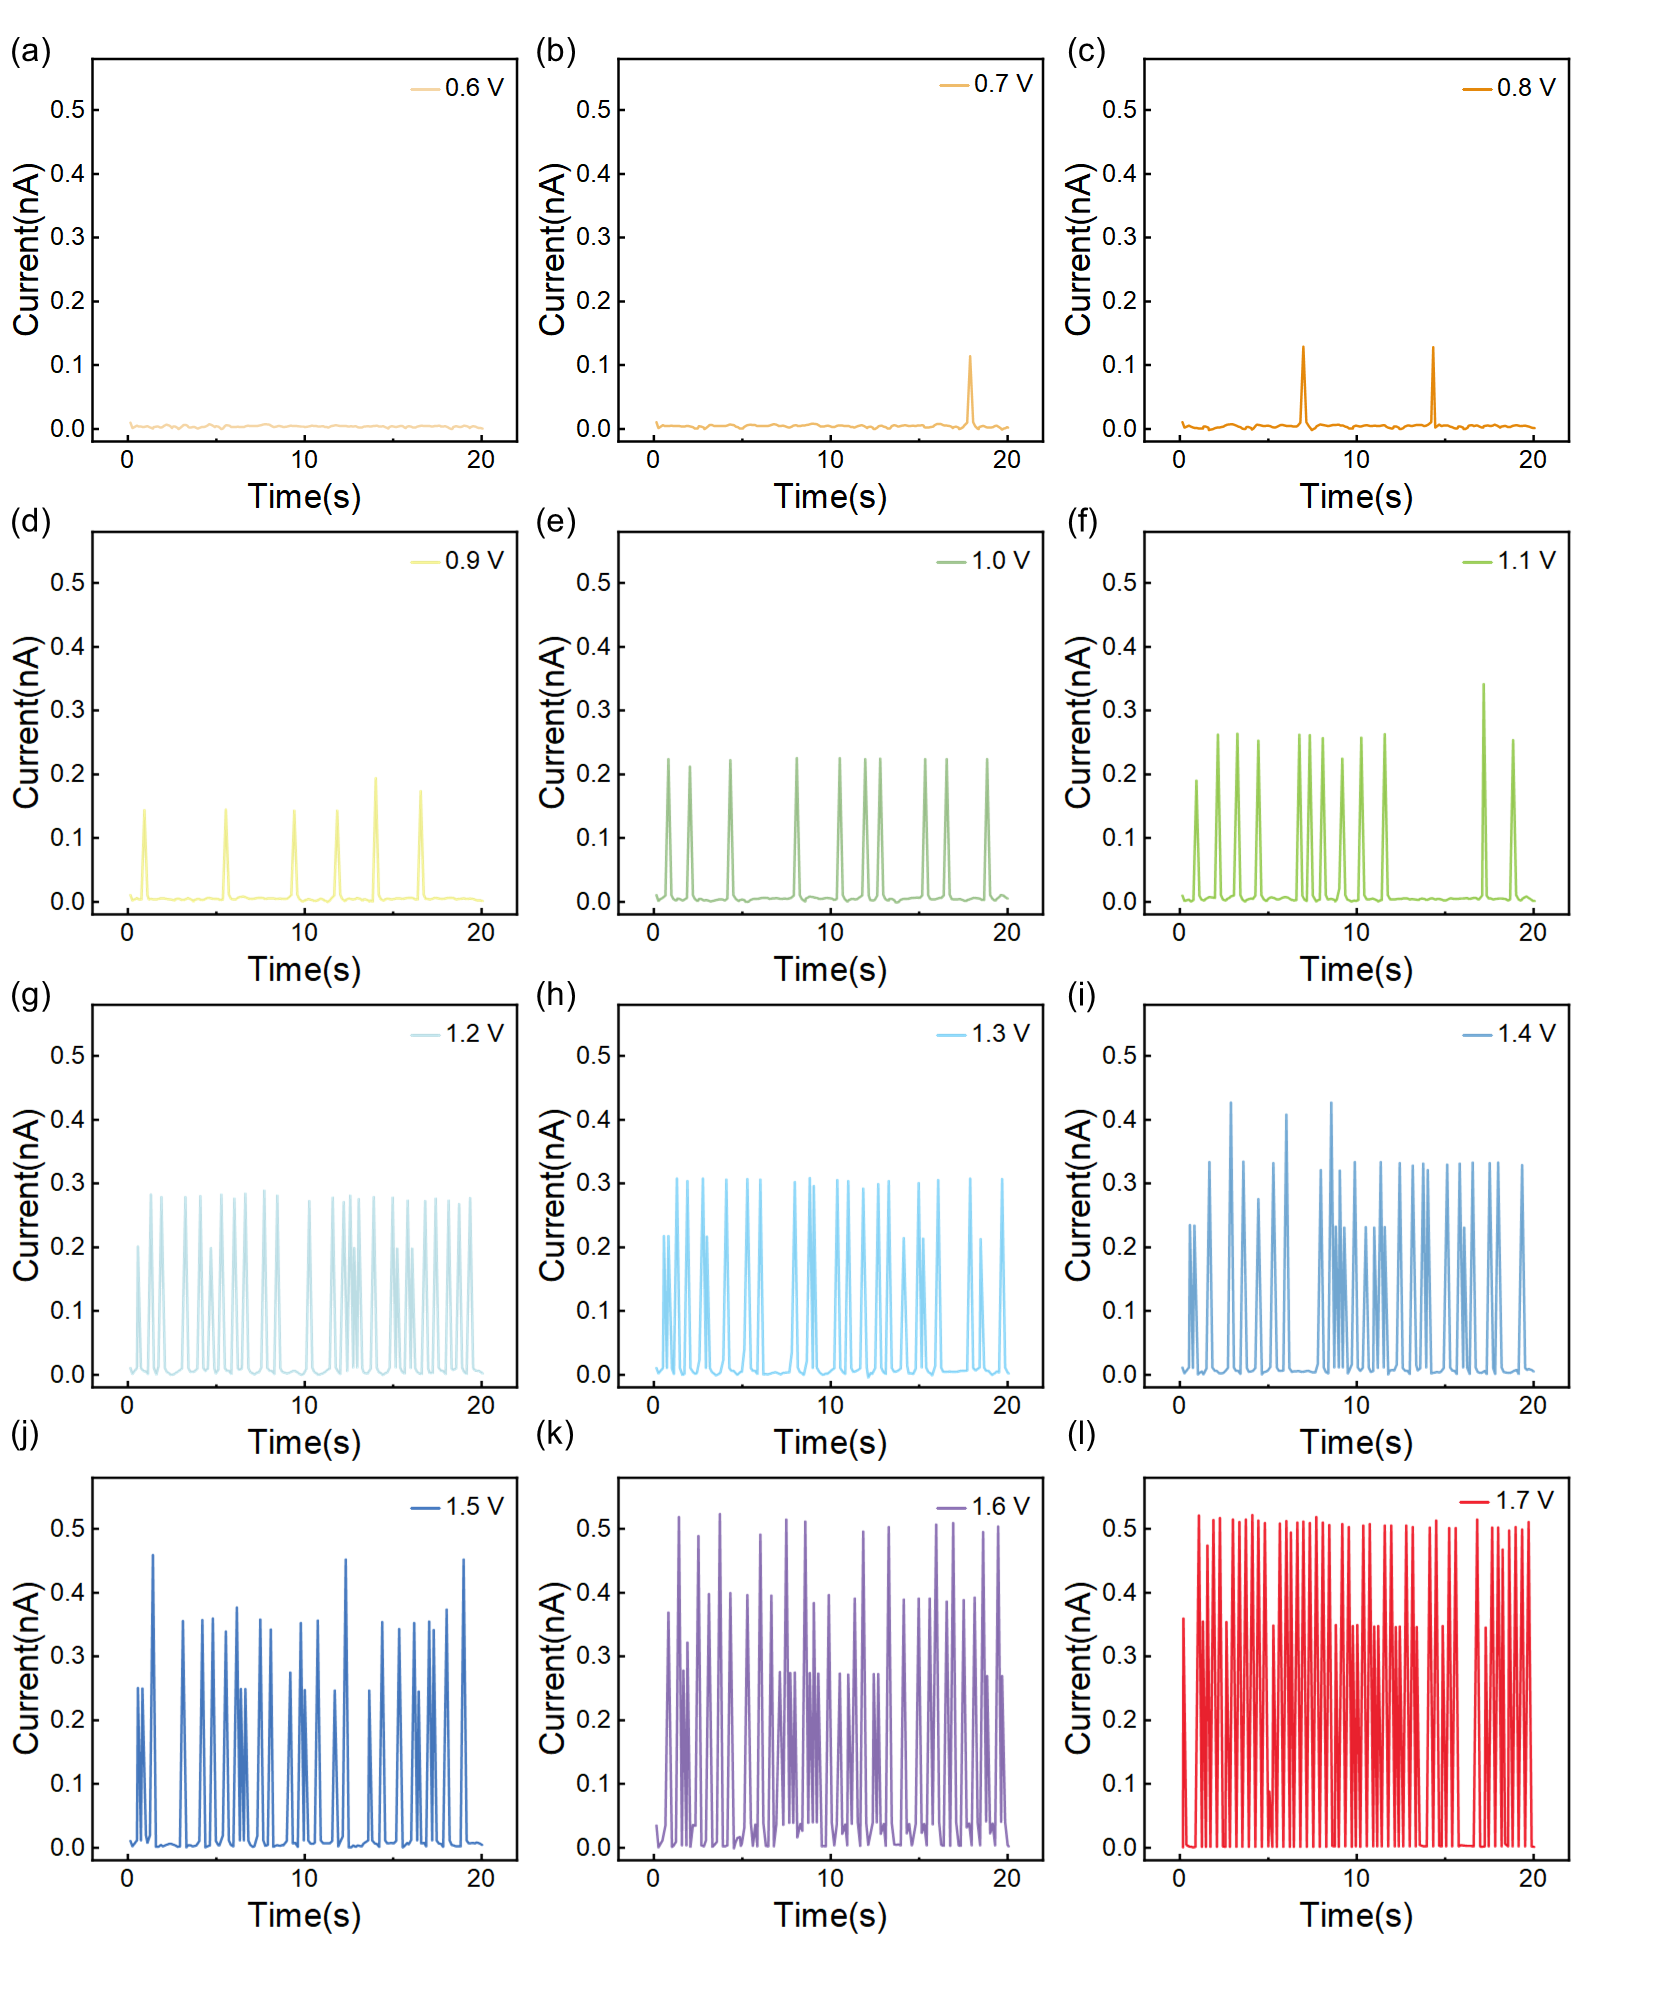


**Supplementary Fig. 7 | LIF function of RNU under different electrical pulse amplitudes**. (a-l) The electrical pulse amplitudes are 0.6, 0.7, 0.8, 0.9, 1.0, 1.1, 1.2, 1.3, 1.4, 1.5, 1.6, 1.7 V (interval: 40 ms, width: 20 ms).

Supplementary Note 5. Fashion-MNIST classification


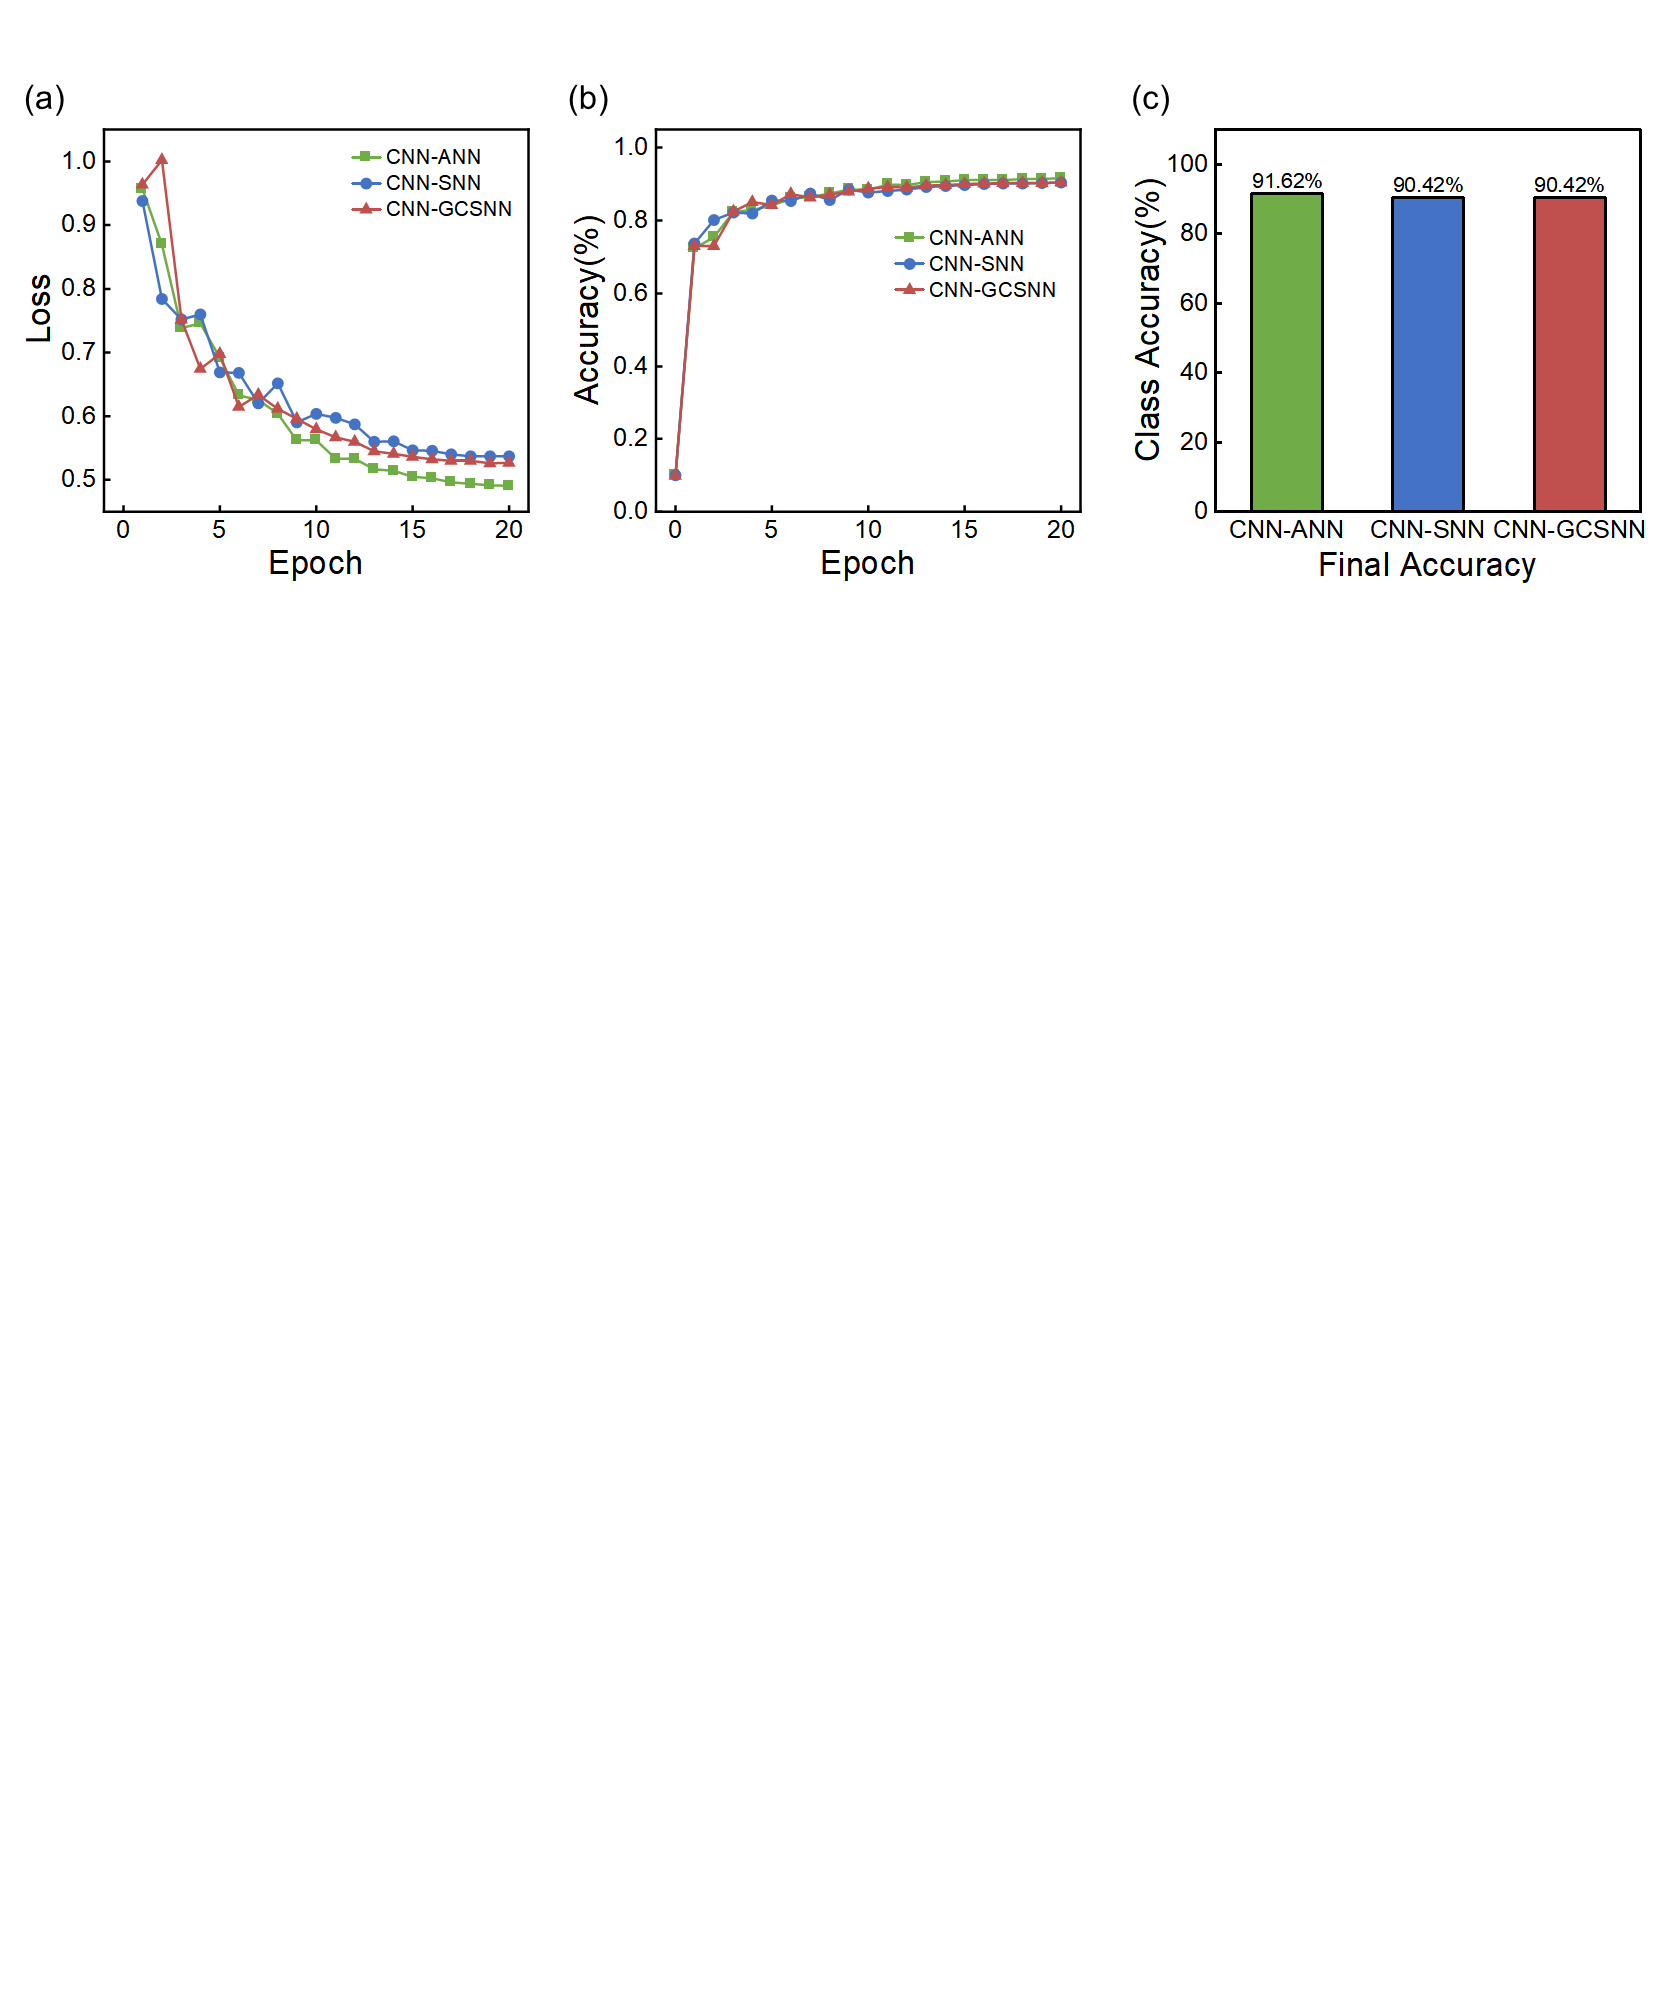


**Supplementary Fig. 8 | Fashion-MNIST classification performance of different backend architectures.** (a) Test loss curves during training. (b) Test accuracy curves during training. (c) Best test accuracies of CNN-ANN, CNN-SNN, and CNN-GCSNN. The three models use the same CNN front-end and differ only in the backend classifier.

Supplementary Note 6. Dynamic EEG classification


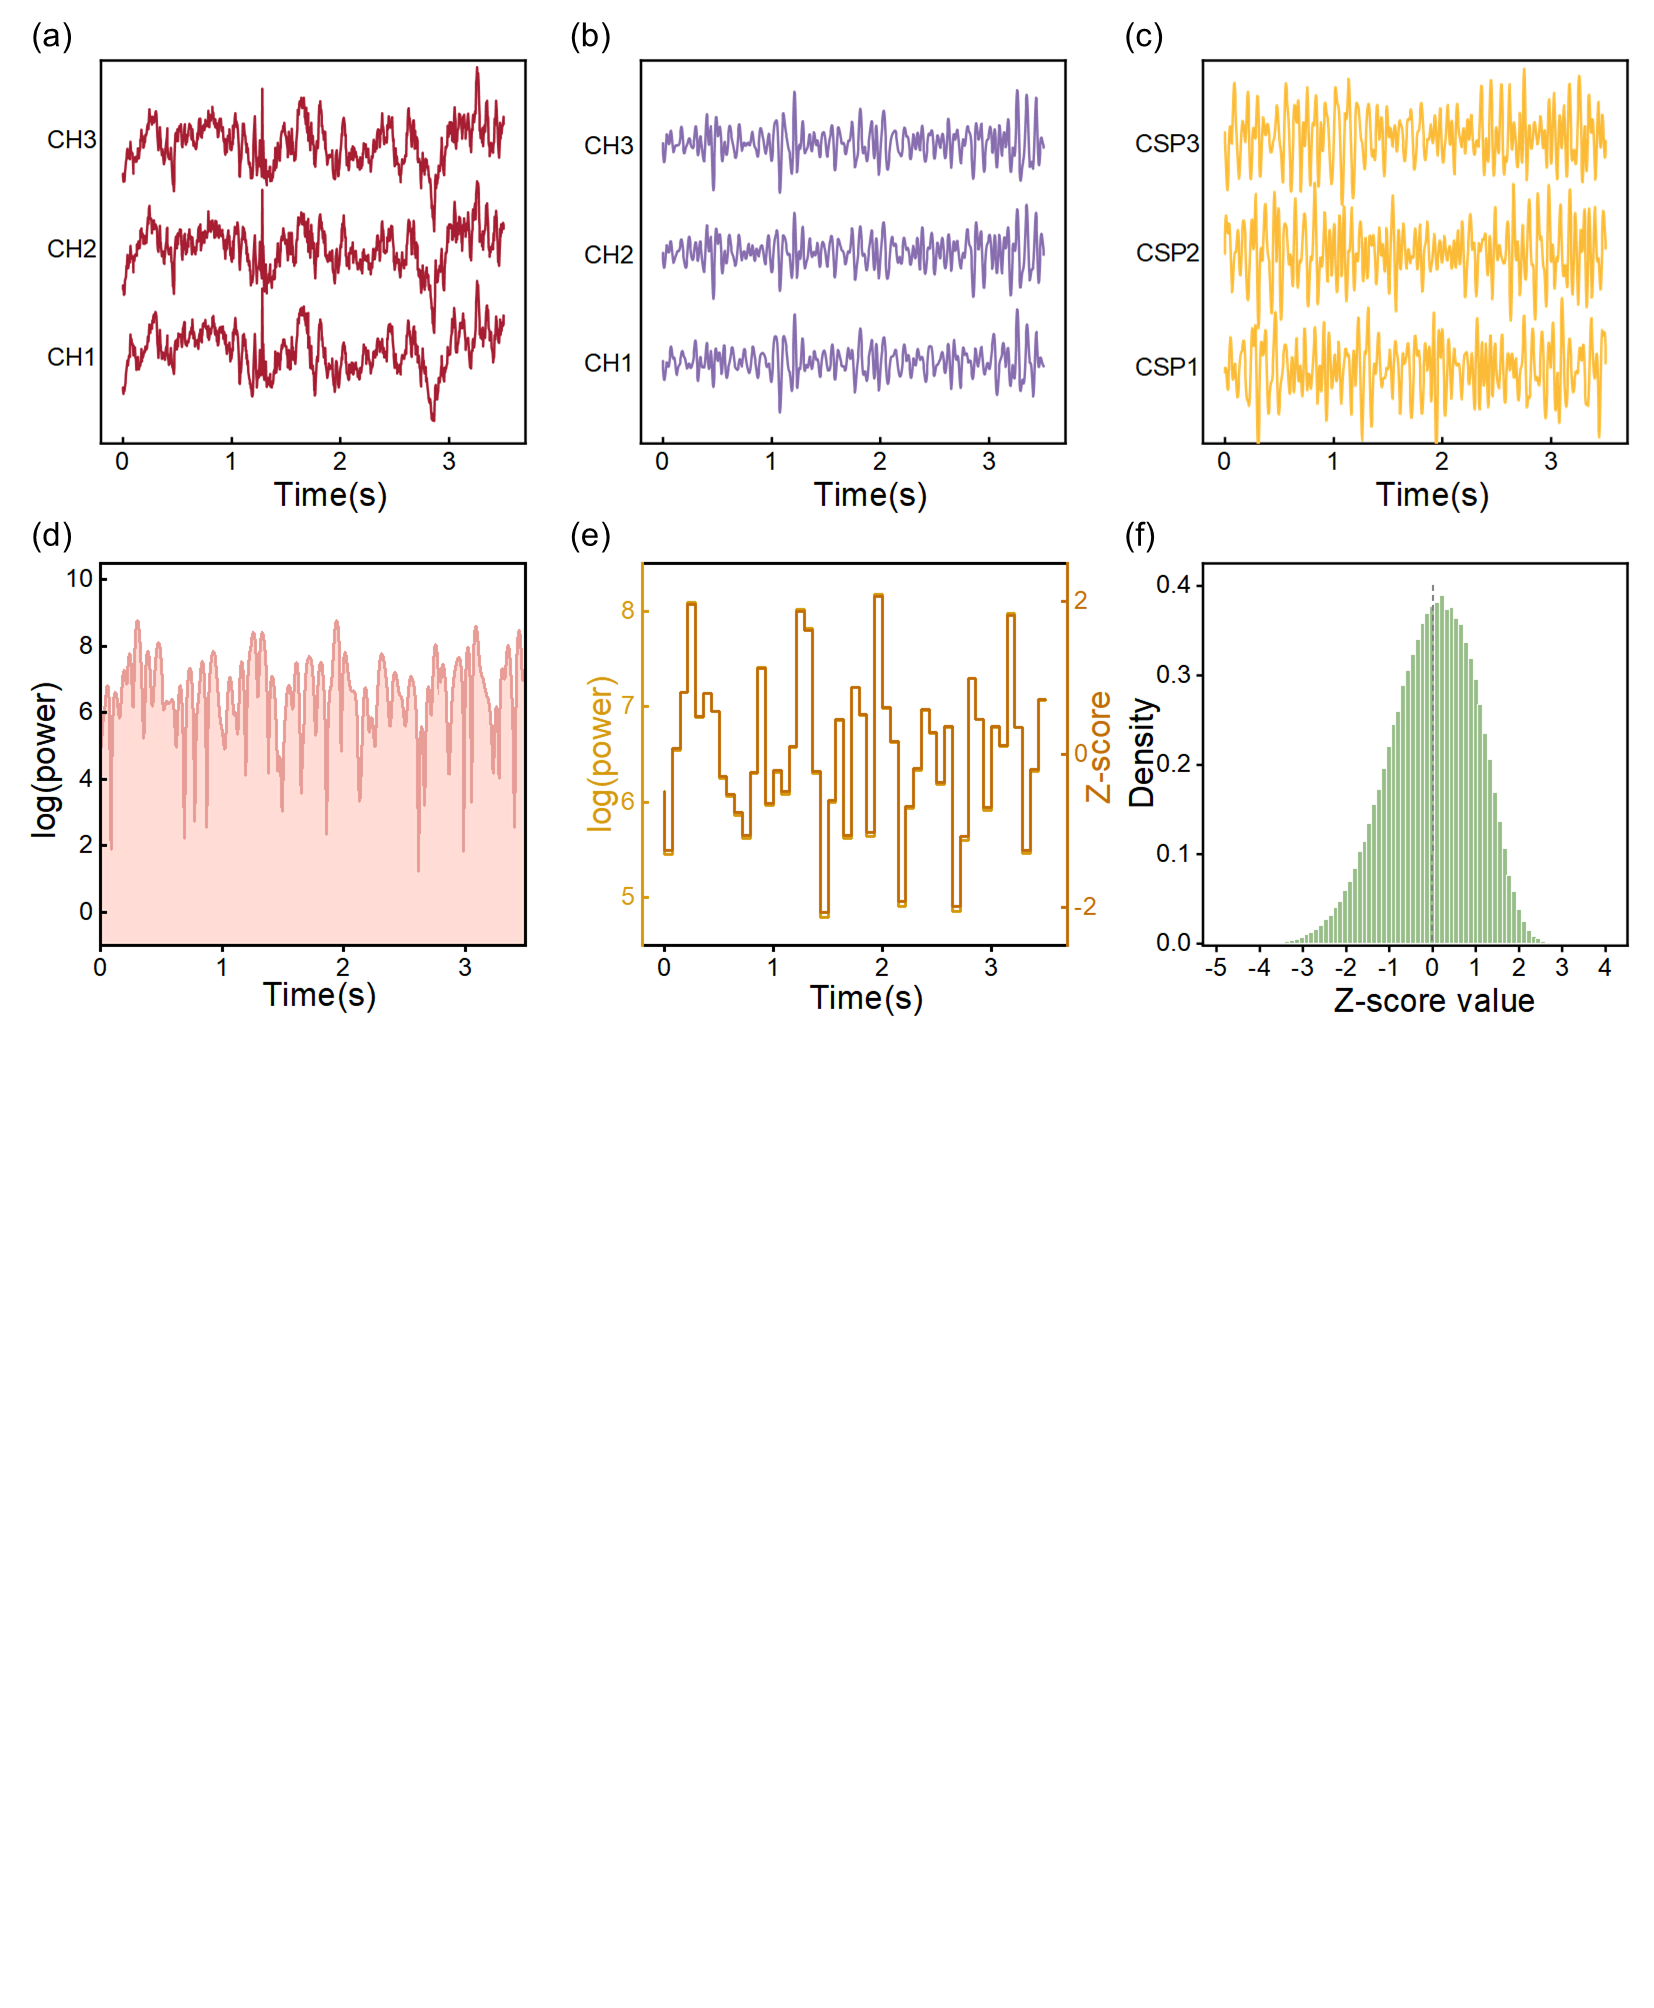


**Supplementary Fig. 9 | EEG signal processing output diagram for each stage.** (a) Raw EEG signals. (b) Bandpass-filtered signals (8-30 Hz) highlighting μ/β rhythms. (c) OVR-CSP projections (first 3 of 32 components) enhancing class-discriminative spatial patterns. (d) Log instantaneous power capturing temporal energy modulation. (e) Segmented averaging and z-score normalization producing 50-step standardized sequences. (f) Input value distribution aggregated across all trials, channels, and time steps, providing well-conditioned bounded inputs for stable SNN training.


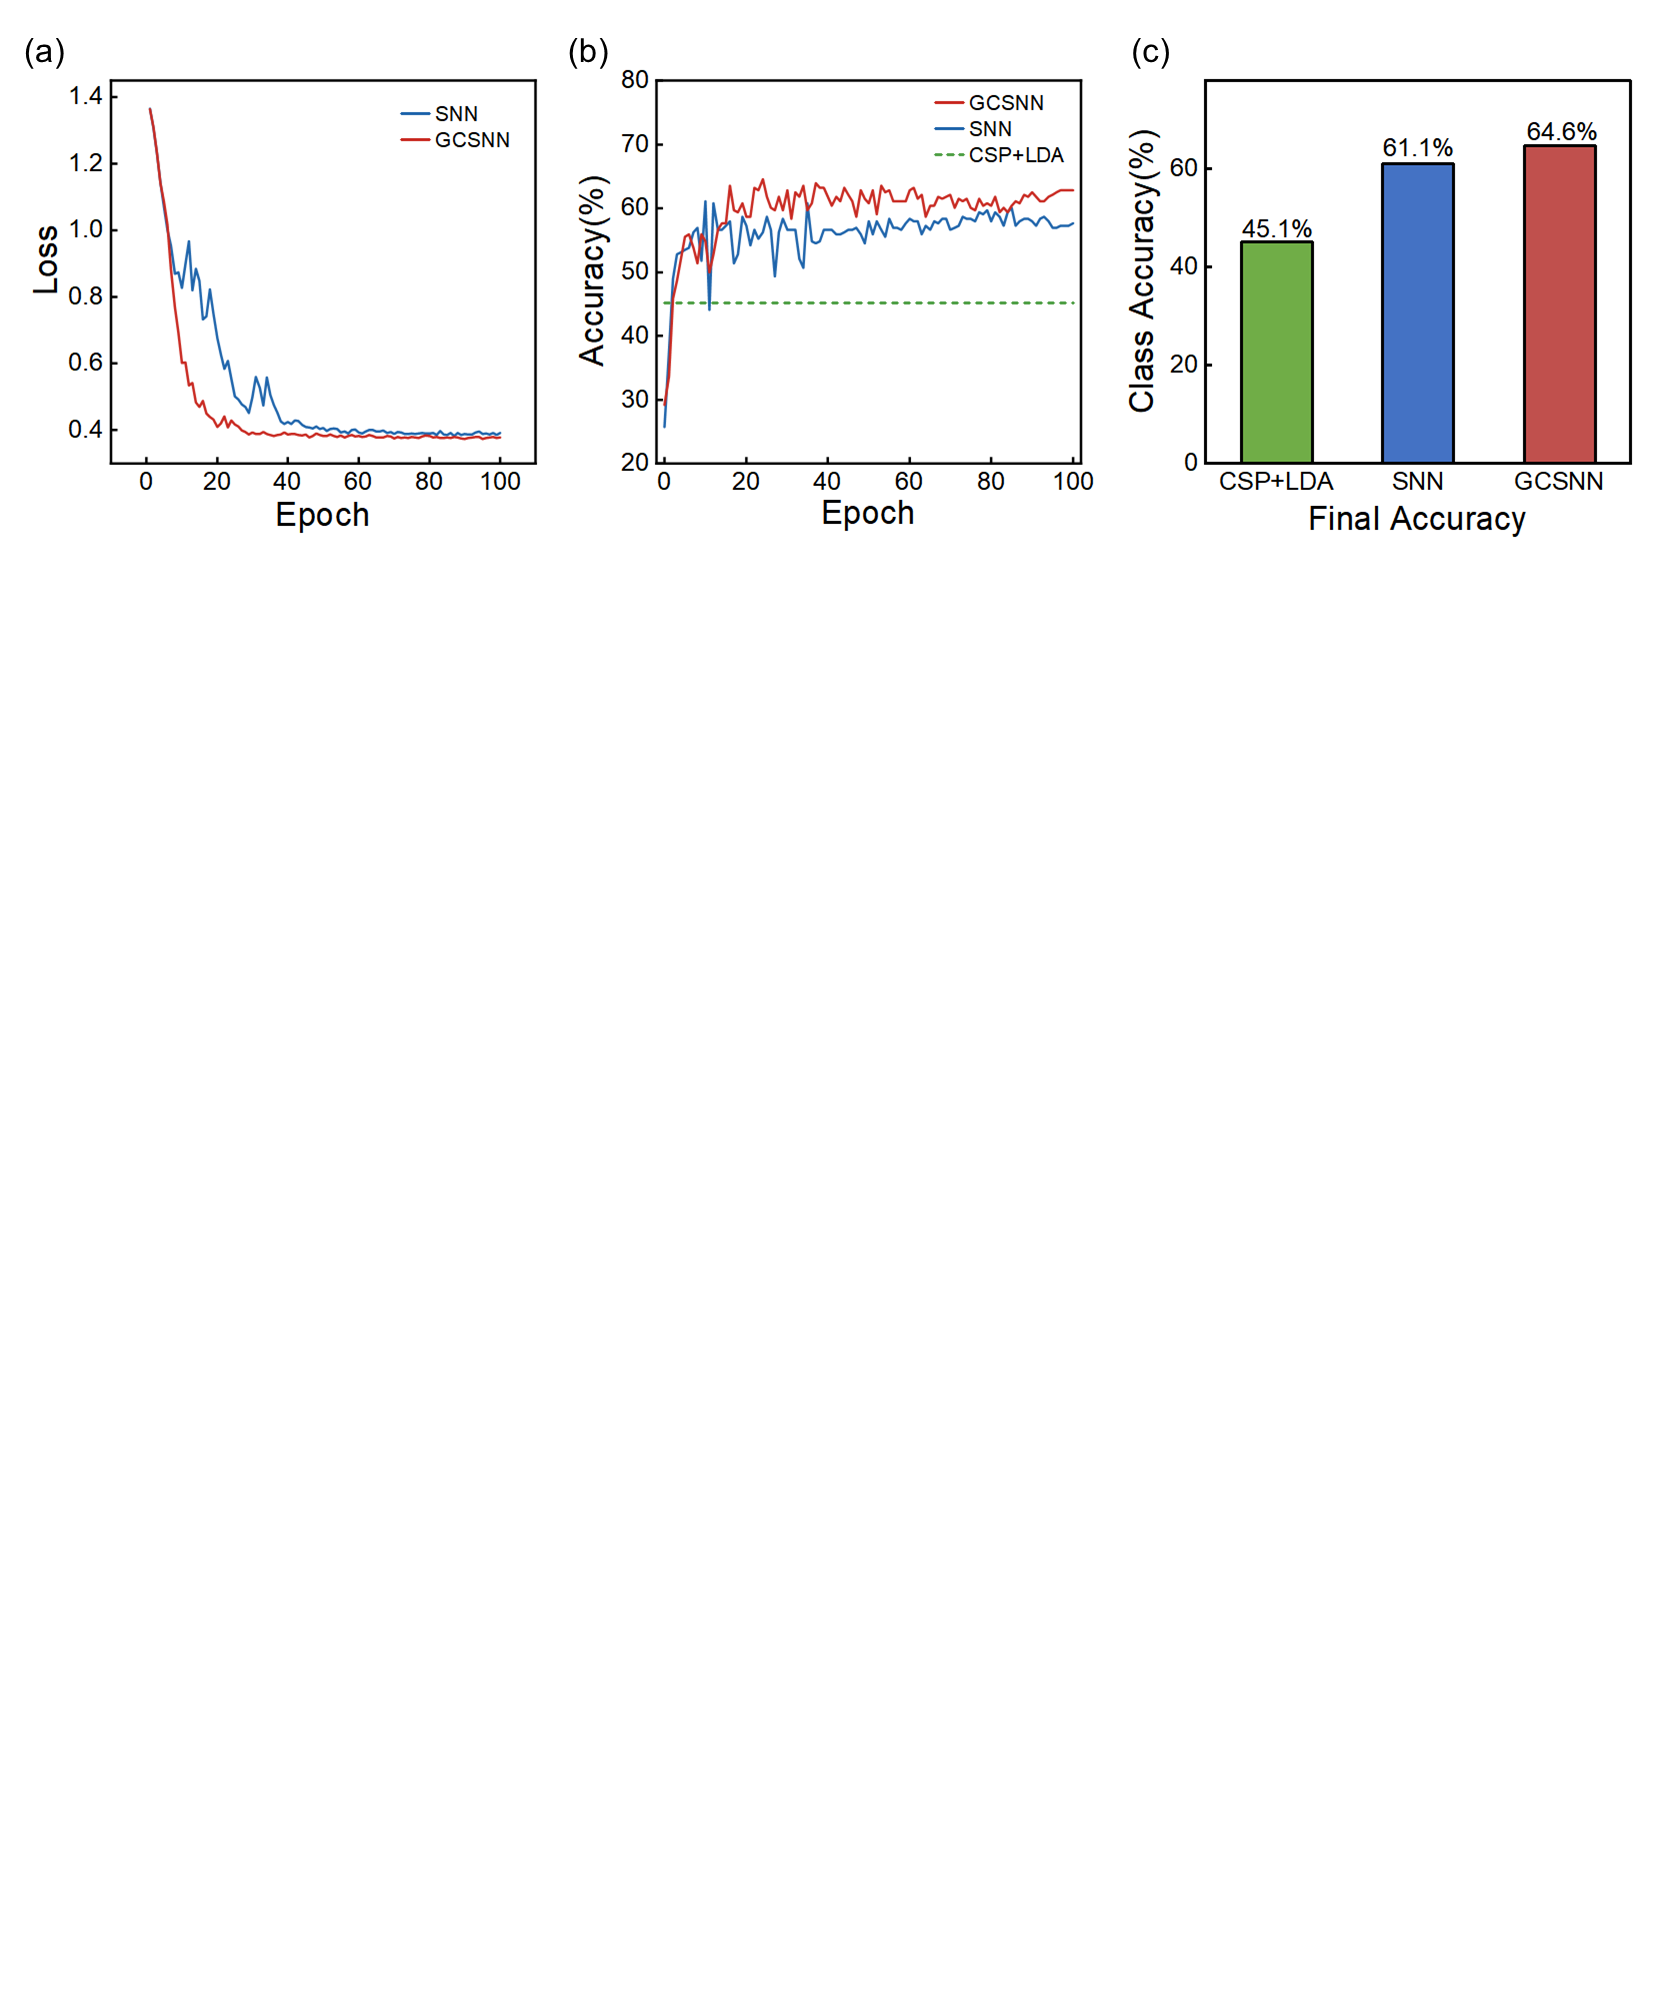


**Supplementary Fig. 10 | EEG four-class decoding performance of CSP+LDA, SNN, and GCSNN.** (a) Training loss curves of SNN and GCSNN. (b) Test accuracy curves of SNN and GCSNN, with the dashed line denoting the CSP+LDA baseline. (c) Best test accuracies of CSP+LDA, SNN, and GCSNN.

Supplementary References

1. B. Pei, X. Han, Y. Wang, J. Liu, Dual-Functional Optoelectronic Synaptic Device Based on MoTe2/h-BN Transistor Through UV Light Induced Doping. *Small* **21**, 2500184 (2025).

2. W. Huang, X. Xia, C. Zhu, P. Steichen, W. Quan, W. Mao, J. Yang, L. Chu, X. Li, Memristive Artificial Synapses for Neuromorphic Computing. *Nano-Micro Lett.* **13**, 85 (2021).

3. Y. Li, G. Shen, Advances in optoelectronic artificial synapses. *Cell Reports Physical Science* **3**, 101037 (2022).

4. F. Tan, C. Chang, N. Zhang, J. An, M. Liu, X. Zhao, M. Che, Z. Liu, Y. Shi, Y. Li, Y. Feng, C. Lin, Y. Zheng, D. Li, M. Lanza, S. Li, Physisorption-assistant optoelectronic synaptic transistors based on Ta2NiSe5/SnS2 heterojunction from ultraviolet to near-infrared. *Light Sci Appl* **14**, 122 (2025).

5. M. M. Islam, M. S. Rahman, H. Heldmyer, S. S. Han, Y. Jung, T. Roy, Bio-inspired “Self-denoising” capability of 2D materials incorporated optoelectronic synaptic array. *npj 2D Mater Appl* **8**, 21 (2024).

6. L. Yin, W. Huang, R. Xiao, W. Peng, Y. Zhu, Y. Zhang, X. Pi, D. Yang, Optically Stimulated Synaptic Devices Based on the Hybrid Structure of Silicon Nanomembrane and Perovskite. *Nano Lett.* **20**, 3378–3387 (2020).
